# Supplementary material for: Advancing antimicrobial polymer development: a novel database and accelerated design via machine learning
Source: Royal Society of Chemistry journal article supplement (doi:10.1039/d4py00736k), 2024-01-01
Supplement: d4py00736k1.xlsx [file d4py00736k1.xlsx]

## Sheet: Sheet1
ID	Polymer	Mw (kg/mol)	Immobilisation	Endgroup 1 (SMILES)	Endgroup 2 (SMILES)	Repeat 1 (SMILES)	Fraction 1	Repeat 2 (SMILES)	Fraction 2	Repeat 3 (SMILES)	Fraction 3	Measurement	Target	Value	Other
1	PEI (polyethylenimine)	750	glass	*-H	*-H	*-CCN-*	1	NIL	N/A	NIL	N/A	% of bacterial killed	S. aureus	14
2	N-methyl-PEI	750	glass	*-C	*-H	*-CCN-*	1	NIL	N/A	NIL	N/A	% of bacterial killed	S. aureus	18	(Airborne )
3	N-ethyl-PEI	750	glass	*-CC	*-H	*-CCN-*	1	NIL	N/A	NIL	N/A	% of bacterial killed	S. aureus	15	(Airborne )
4	N-butyl-PEI	750	glass	*-CCCC	*-H	*-CCN-*	1	NIL	N/A	NIL	N/A	% of bacterial killed	S. aureus	62	(Airborne )
5	N-hexyl-PEI	750	glass	*-CCCCCC	*-H	*-CCN-*	1	NIL	N/A	NIL	N/A	% of bacterial killed	S. aureus	80	(Airborne )
5	N-hexyl-PEI	750	glass	*-CCCCCC	*-H	*-CCN-*	1	NIL	N/A	NIL	N/A	% of bacterial killed	S. epidermidis	78	(Airborne )
5	N-hexyl-PEI	750	glass	*-CCCCCC	*-H	*-CCN-*	1	NIL	N/A	NIL	N/A	% of bacterial killed	P. aeruginosa	73	(Airborne )
5	N-hexyl-PEI	750	glass	*-CCCCCC	*-H	*-CCN-*	1	NIL	N/A	NIL	N/A	% of bacterial killed	E. coli	74	(Airborne )
5	N-hexyl-PEI	750	Fe3O4 nanoparticles	*-CCCCCC	*-H	*-CCN-*	1	NIL	N/A	NIL	N/A	% of bacterial killed	S. aureus	49	(waterborne)
5	N-hexyl-PEI	750	Fe3O4 nanoparticles	*-CCCCCC	*-H	*-CCN-*	1	NIL	N/A	NIL	N/A	% of bacterial killed	S. aureus	52	(waterborne)
5	N-hexyl-PEI	750	Fe3O4 nanoparticles	*-CCCCCC	*-H	*-CCN-*	1	NIL	N/A	NIL	N/A	% of bacterial killed	S. aureus	67	(waterborne)
5	N-hexyl-PEI	750	Fe3O4 nanoparticles	*-CCCCCC	*-H	*-CCN-*	1	NIL	N/A	NIL	N/A	% of bacterial killed	S. aureus	70	(waterborne)
6	N-dodecyl-PEI	750	glass	*-CCCCCCCCCCCC	*-H	*-CCN-*	1	NIL	N/A	NIL	N/A	% of bacterial killed	S. aureus	66	(Airborne )
7	N-octadecyl-PEI	750	glass	*-CCCCCCCCCCCCCCCCCC	*-H	*-CCN-*	1	NIL	N/A	NIL	N/A	% of bacterial killed	S. aureus	44	(Airborne )
8	N-ethyl-(N-methyl-PEI)	750	glass	*-CC	*-H	CN(-*)CC-*	1	NIL	N/A	NIL	N/A	% of bacterial killed	S. aureus	22	(Airborne )
9	N-butyl-(N-methyl-PEI)	750	glass	*-CCCC	*-H	CN(-*)CC-*	1	NIL	N/A	NIL	N/A	% of bacterial killed	S. aureus	56	(Airborne )
10	N-hexyl-(N-methyl-PEI)	750	glass	*-CCCCCC	*-H	CN(-*)CC-*	1	NIL	N/A	NIL	N/A	% of bacterial killed	S. aureus	90	(Airborne )
10	N-hexyl-(N-methyl-PEI)	750	glass	*-CCCCCC	*-H	CN(-*)CC-*	1	NIL	N/A	NIL	N/A	% of bacterial killed	S. epidermidis	98	(Airborne )
10	N-hexyl-(N-methyl-PEI)	750	glass	*-CCCCCC	*-H	CN(-*)CC-*	1	NIL	N/A	NIL	N/A	% of bacterial killed	P. aeruginosa	97	(Airborne )
10	N-hexyl-(N-methyl-PEI)	750	glass	*-CCCCCC	*-H	CN(-*)CC-*	1	NIL	N/A	NIL	N/A	% of bacterial killed	E. coli	96	(Airborne )
10	N-hexyl-PEI	750	Fe3O4 nanoparticles	*-CCCCCC	*-H	CN(-*)CC-*	1	NIL	N/A	NIL	N/A	% of bacterial killed	S. aureus	49	(waterborne)
10	N-hexyl-PEI	750	Fe3O4 nanoparticles	*-CCCCCC	*-H	CN(-*)CC-*	1	NIL	N/A	NIL	N/A	% of bacterial killed	S. aureus	52	(waterborne)
10	N-hexyl-PEI	750	Fe3O4 nanoparticles	*-CCCCCC	*-H	CN(-*)CC-*	1	NIL	N/A	NIL	N/A	% of bacterial killed	S. aureus	67	(waterborne)
10	N-hexyl-PEI	750	Fe3O4 nanoparticles	*-CCCCCC	*-H	CN(-*)CC-*	1	NIL	N/A	NIL	N/A	% of bacterial killed	S. aureus	70	(waterborne)
11	N-dodecyl-(N-methyl-PEI)	750	glass	*-CCCCCCCCCCCC	*-H	CN(-*)CC-*	1	NIL	N/A	NIL	N/A	% of bacterial killed	S. aureus	92	(Airborne )
12	N-octadecyl-(N-methyl-PEI)	750	glass	*-CCCCCCCCCCCCCCCCCC	*-H	CN(-*)CC-*	1	NIL	N/A	NIL	N/A	% of bacterial killed	S. aureus	93	(Airborne )
13	poly(vinyl-N-hexylpyridinium bromide)	N/A	HDPE	*-H	*-H	[Br-].CCCCCC[N+]1=CC=C(C=C1)C(-*)C-*	1	NIL	N/A	NIL	N/A	% of bacterial killed	S. aureus	96	(airborne)
13	poly(vinyl-N-hexylpyridinium bromide)	N/A	LDPE	*-H	*-H	[Br-].CCCCCC[N+]1=CC=C(C=C1)C(-*)C-*	1	NIL	N/A	NIL	N/A	% of bacterial killed	S. aureus	97	(airborne)
13	poly(vinyl-N-hexylpyridinium bromide)	N/A	PP	*-H	*-H	[Br-].CCCCCC[N+]1=CC=C(C=C1)C(-*)C-*	1	NIL	N/A	NIL	N/A	% of bacterial killed	S. aureus	90	(airborne)
13	poly(vinyl-N-hexylpyridinium bromide)	N/A	Nylon 6/6	*-H	*-H	[Br-].CCCCCC[N+]1=CC=C(C=C1)C(-*)C-*	1	NIL	N/A	NIL	N/A	% of bacterial killed	S. aureus	92	(airborne)
13	poly(vinyl-N-hexylpyridinium bromide)	N/A	PET	*-H	*-H	[Br-].CCCCCC[N+]1=CC=C(C=C1)C(-*)C-*	1	NIL	N/A	NIL	N/A	% of bacterial killed	S. aureus	95	(airborne)
13	poly(vinyl-N-hexylpyridinium bromide)	N/A	HDPE	*-H	*-H	[Br-].CCCCCC[N+]1=CC=C(C=C1)C(-*)C-*	1	NIL	N/A	NIL	N/A	% of bacterial killed	E. coli	97	(airborne)
13	poly(vinyl-N-hexylpyridinium bromide)	N/A	LDPE	*-H	*-H	[Br-].CCCCCC[N+]1=CC=C(C=C1)C(-*)C-*	1	NIL	N/A	NIL	N/A	% of bacterial killed	E. coli	96	(airborne)
13	poly(vinyl-N-hexylpyridinium bromide)	N/A	PP	*-H	*-H	[Br-].CCCCCC[N+]1=CC=C(C=C1)C(-*)C-*	1	NIL	N/A	NIL	N/A	% of bacterial killed	E. coli	98	(airborne)
13	poly(vinyl-N-hexylpyridinium bromide)	N/A	Nylon 6/6	*-H	*-H	[Br-].CCCCCC[N+]1=CC=C(C=C1)C(-*)C-*	1	NIL	N/A	NIL	N/A	% of bacterial killed	E. coli	98	(airborne)
13	poly(vinyl-N-hexylpyridinium bromide)	N/A	PET	*-H	*-H	[Br-].CCCCCC[N+]1=CC=C(C=C1)C(-*)C-*	1	NIL	N/A	NIL	N/A	% of bacterial killed	E. coli	95	(airborne)
13	poly(vinyl-N-hexylpyridinium bromide)	N/A	HDPE	*-H	*-H	[Br-].CCCCCC[N+]1=CC=C(C=C1)C(-*)C-*	1	NIL	N/A	NIL	N/A	% of bacterial killed	S. aureus	98	(waterborne)
13	poly(vinyl-N-hexylpyridinium bromide)	N/A	LDPE	*-H	*-H	[Br-].CCCCCC[N+]1=CC=C(C=C1)C(-*)C-*	1	NIL	N/A	NIL	N/A	% of bacterial killed	S. aureus	99	(waterborne)
13	poly(vinyl-N-hexylpyridinium bromide)	N/A	PP	*-H	*-H	[Br-].CCCCCC[N+]1=CC=C(C=C1)C(-*)C-*	1	NIL	N/A	NIL	N/A	% of bacterial killed	S. aureus	97	(waterborne)
13	poly(vinyl-N-hexylpyridinium bromide)	N/A	Nylon 6/6	*-H	*-H	[Br-].CCCCCC[N+]1=CC=C(C=C1)C(-*)C-*	1	NIL	N/A	NIL	N/A	% of bacterial killed	S. aureus	97	(waterborne)
13	poly(vinyl-N-hexylpyridinium bromide)	N/A	PET	*-H	*-H	[Br-].CCCCCC[N+]1=CC=C(C=C1)C(-*)C-*	1	NIL	N/A	NIL	N/A	% of bacterial killed	S. aureus	99	(waterborne)
13	poly(vinyl-N-hexylpyridinium bromide)	N/A	HDPE	*-H	*-H	[Br-].CCCCCC[N+]1=CC=C(C=C1)C(-*)C-*	1	NIL	N/A	NIL	N/A	% of bacterial killed	E. coli	97	(waterborne)
13	poly(vinyl-N-hexylpyridinium bromide)	N/A	LDPE	*-H	*-H	[Br-].CCCCCC[N+]1=CC=C(C=C1)C(-*)C-*	1	NIL	N/A	NIL	N/A	% of bacterial killed	E. coli	98	(waterborne)
13	poly(vinyl-N-hexylpyridinium bromide)	N/A	Nylon 6/6	*-H	*-H	[Br-].CCCCCC[N+]1=CC=C(C=C1)C(-*)C-*	1	NIL	N/A	NIL	N/A	% of bacterial killed	E. coli	99	(waterborne)
13	poly(vinyl-N-hexylpyridinium bromide)	N/A	PET	*-H	*-H	[Br-].CCCCCC[N+]1=CC=C(C=C1)C(-*)C-*	1	NIL	N/A	NIL	N/A	% of bacterial killed	E. coli	98	(waterborne)
14	poly(N1-4-(2-acryloyloxyethyl)phenyl-N5-phenylbiguanide hydrochloride)	11.7	N/A	*-H	*-H	Cl[H].*-CC(-*)C(=O)OCCC1=CC=C(NC(=N)NC(=N)NC2=CC=CC=C2)C=C1	1	NIL	N/A	NIL	N/A	MIC(μg/mL)	B. subtilis	215	(100-330)
14	poly(N1-4-(2-acryloyloxyethyl)phenyl-N5-phenylbiguanide hydrochloride)	11.7	N/A	*-H	*-H	Cl[H].*-CC(-*)C(=O)OCCC1=CC=C(NC(=N)NC(=N)NC2=CC=CC=C2)C=C1	1	NIL	N/A	NIL	N/A	MIC(μg/mL)	S. aureus	215	(100-330)
14	poly(N1-4-(2-acryloyloxyethyl)phenyl-N5-phenylbiguanide hydrochloride)	11.7	N/A	*-H	*-H	Cl[H].*-CC(-*)C(=O)OCCC1=CC=C(NC(=N)NC(=N)NC2=CC=CC=C2)C=C1	1	NIL	N/A	NIL	N/A	MIC(μg/mL)	E. coli	>1000
14	poly(N1-4-(2-acryloyloxyethyl)phenyl-N5-phenylbiguanide hydrochloride)	11.7	N/A	*-H	*-H	Cl[H].*-CC(-*)C(=O)OCCC1=CC=C(NC(=N)NC(=N)NC2=CC=CC=C2)C=C1	1	NIL	N/A	NIL	N/A	MIC(μg/mL)	A. aerogenes	>1000
14	poly(N1-4-(2-acryloyloxyethyl)phenyl-N5-phenylbiguanide hydrochloride)	11.7	N/A	*-H	*-H	Cl[H].*-CC(-*)C(=O)OCCC1=CC=C(NC(=N)NC(=N)NC2=CC=CC=C2)C=C1	1	NIL	N/A	NIL	N/A	MIC(μg/mL)	P. aeruginosa	>1000
15	poly(N1-4-(2-acryloyloxyethyl)phenyl-N5-4-chlorophenylbiguanide hydrochloride)	11.9	N/A	*-H	*-H	Cl[H].ClC1=CC=C(NC(=N)NC(=N)NC2=CC=C(CCOC(=O)C(-*)C-*)C=C2)C=C1	1	NIL	N/A	NIL	N/A	MIC(μg/mL)	B. subtilis	215	(100-330)
15	poly(N1-4-(2-acryloyloxyethyl)phenyl-N5-4-chlorophenylbiguanide hydrochloride)	11.9	N/A	*-H	*-H	Cl[H].ClC1=CC=C(NC(=N)NC(=N)NC2=CC=C(CCOC(=O)C(-*)C-*)C=C2)C=C1	1	NIL	N/A	NIL	N/A	MIC(μg/mL)	S. aureus	215	(100-330)
15	poly(N1-4-(2-acryloyloxyethyl)phenyl-N5-4-chlorophenylbiguanide hydrochloride)	11.9	N/A	*-H	*-H	Cl[H].ClC1=CC=C(NC(=N)NC(=N)NC2=CC=C(CCOC(=O)C(-*)C-*)C=C2)C=C1	1	NIL	N/A	NIL	N/A	MIC(μg/mL)	E. coli	830	(660-1000)
15	poly(N1-4-(2-acryloyloxyethyl)phenyl-N5-4-chlorophenylbiguanide hydrochloride)	11.9	N/A	*-H	*-H	Cl[H].ClC1=CC=C(NC(=N)NC(=N)NC2=CC=C(CCOC(=O)C(-*)C-*)C=C2)C=C1	1	NIL	N/A	NIL	N/A	MIC(μg/mL)	A. aerogenes	830	(660-1000)
15	poly(N1-4-(2-acryloyloxyethyl)phenyl-N5-4-chlorophenylbiguanide hydrochloride)	11.9	N/A	*-H	*-H	Cl[H].ClC1=CC=C(NC(=N)NC(=N)NC2=CC=C(CCOC(=O)C(-*)C-*)C=C2)C=C1	1	NIL	N/A	NIL	N/A	MIC(μg/mL)	P. aeruginosa	>1000
16	poly(N1-4-(2-acryloyloxyethyl)phenyl-N5-3,4-dichlorophenylbiguanide hydrochloride)	12.1	N/A	*-H	*-H	Cl[H].ClC1=CC=C(NC(=N)NC(=N)NC2=CC=C(CCOC(=O)C(-*)C-*)C=C2)C=C1Cl	1	NIL	N/A	NIL	N/A	MIC(μg/mL)	B. subtilis	215	(100-330)
16	poly(N1-4-(2-acryloyloxyethyl)phenyl-N5-3,4-dichlorophenylbiguanide hydrochloride)	12.1	N/A	*-H	*-H	Cl[H].ClC1=CC=C(NC(=N)NC(=N)NC2=CC=C(CCOC(=O)C(-*)C-*)C=C2)C=C1Cl	1	NIL	N/A	NIL	N/A	MIC(μg/mL)	S. aureus	215	(100-330)
16	poly(N1-4-(2-acryloyloxyethyl)phenyl-N5-3,4-dichlorophenylbiguanide hydrochloride)	12.1	N/A	*-H	*-H	Cl[H].ClC1=CC=C(NC(=N)NC(=N)NC2=CC=C(CCOC(=O)C(-*)C-*)C=C2)C=C1Cl	1	NIL	N/A	NIL	N/A	MIC(μg/mL)	E. coli	830	(660-1000)
16	poly(N1-4-(2-acryloyloxyethyl)phenyl-N5-3,4-dichlorophenylbiguanide hydrochloride)	12.1	N/A	*-H	*-H	Cl[H].ClC1=CC=C(NC(=N)NC(=N)NC2=CC=C(CCOC(=O)C(-*)C-*)C=C2)C=C1Cl	1	NIL	N/A	NIL	N/A	MIC(μg/mL)	A. aerogenes	830	(660-1000)
16	poly(N1-4-(2-acryloyloxyethyl)phenyl-N5-3,4-dichlorophenylbiguanide hydrochloride)	12.1	N/A	*-H	*-H	Cl[H].ClC1=CC=C(NC(=N)NC(=N)NC2=CC=C(CCOC(=O)C(-*)C-*)C=C2)C=C1Cl	1	NIL	N/A	NIL	N/A	MIC(μg/mL)	P. aeruginosa	830	(660-1000)
17	ɛ-poly-L-lysine (n=25~30)	3.5	N/A	*-H	*-H	NC(CCCCN-*)C(-*)=O	1	NIL	N/A	NIL	N/A	MIC(μg/mL)	Penicillium urticae	>256	(IFO 7011)	(waterborne)
17	ɛ-poly-L-lysine (n=25~30)	3.5	N/A	*-H	*-H	NC(CCCCN-*)C(-*)=O	1	NIL	N/A	NIL	N/A	MIC(μg/mL)	P. chrysogenum	256	(IFO 4897)	(waterborne)
17	ɛ-poly-L-lysine (n=25~30)	3.5	N/A	*-H	*-H	NC(CCCCN-*)C(-*)=O	1	NIL	N/A	NIL	N/A	MIC(μg/mL)	Aspergillus niger	>256	(van. Tieghem IFO 4416)	(waterborne)
17	ɛ-poly-L-lysine (n=25~30)	3.5	N/A	*-H	*-H	NC(CCCCN-*)C(-*)=O	1	NIL	N/A	NIL	N/A	MIC(μg/mL)	Fusarium oxysporum	>256	(IFO 5880)	(waterborne)
17	ɛ-poly-L-lysine (n=25~30)	3.5	N/A	*-H	*-H	NC(CCCCN-*)C(-*)=O	1	NIL	N/A	NIL	N/A	MIC(μg/mL)	Saccharomycopsis lipolytica	256	(IFO 0746)	(waterborne)
17	ɛ-poly-L-lysine (n=25~30)	3.5	N/A	*-H	*-H	NC(CCCCN-*)C(-*)=O	1	NIL	N/A	NIL	N/A	MIC(μg/mL)	Candida tropicalis	128	(IFO 0589)	(waterborne)
17	ɛ-poly-L-lysine (n=25~30)	3.5	N/A	*-H	*-H	NC(CCCCN-*)C(-*)=O	1	NIL	N/A	NIL	N/A	MIC(μg/mL)	C. albicans	128		(waterborne)
17	ɛ-poly-L-lysine (n=25~30)	3.5	N/A	*-H	*-H	NC(CCCCN-*)C(-*)=O	1	NIL	N/A	NIL	N/A	MIC(μg/mL)	C. utilis	128		(waterborne)
17	ɛ-poly-L-lysine (n=25~30)	3.5	N/A	*-H	*-H	NC(CCCCN-*)C(-*)=O	1	NIL	N/A	NIL	N/A	MIC(μg/mL)	S. cerevisiae	128		(waterborne)
17	ɛ-poly-L-lysine (n=25~30)	3.5	N/A	*-H	*-H	NC(CCCCN-*)C(-*)=O	1	NIL	N/A	NIL	N/A	MIC(μg/mL)	E. coli	1	(K-12 IFO 3301)	(waterborne)
17	ɛ-poly-L-lysine (n=25~30)	3.5	N/A	*-H	*-H	NC(CCCCN-*)C(-*)=O	1	NIL	N/A	NIL	N/A	MIC(μg/mL)	E. coli	2	(F-2)	(waterborne)
17	ɛ-poly-L-lysine (n=25~30)	3.5	N/A	*-H	*-H	NC(CCCCN-*)C(-*)=O	1	NIL	N/A	NIL	N/A	MIC(μg/mL)	E. coli	1	(B IFO 13168)	(waterborne)
17	ɛ-poly-L-lysine (n=25~30)	3.5	N/A	*-H	*-H	NC(CCCCN-*)C(-*)=O	1	NIL	N/A	NIL	N/A	MIC(μg/mL)	E. coli	1	(C IFO 13892)	(waterborne)
17	ɛ-poly-L-lysine (n=25~30)	3.5	N/A	*-H	*-H	NC(CCCCN-*)C(-*)=O	1	NIL	N/A	NIL	N/A	MIC(μg/mL)	Ps. Sputida	2	(IFO 3738)	(waterborne)
17	ɛ-poly-L-lysine (n=25~30)	3.5	N/A	*-H	*-H	NC(CCCCN-*)C(-*)=O	1	NIL	N/A	NIL	N/A	MIC(μg/mL)	P. aeruginosa	3	(IFO 3923)	(waterborne)
17	ɛ-poly-L-lysine (n=25~30)	3.5	N/A	*-H	*-H	NC(CCCCN-*)C(-*)=O	1	NIL	N/A	NIL	N/A	MIC(μg/mL)	Proteus vulgaris	2	(IFO 3851)	(waterborne)
17	ɛ-poly-L-lysine (n=25~30)	3.5	N/A	*-H	*-H	NC(CCCCN-*)C(-*)=O	1	NIL	N/A	NIL	N/A	MIC(μg/mL)	Serratia marcescens	8	(IFO 12648)	(waterborne)
17	ɛ-poly-L-lysine (n=25~30)	3.5	N/A	*-H	*-H	NC(CCCCN-*)C(-*)=O	1	NIL	N/A	NIL	N/A	MIC(μg/mL)	Aerobacter aerogenes	8	(IFO 3317)	(waterborne)
17	ɛ-poly-L-lysine (n=25~30)	3.5	N/A	*-H	*-H	NC(CCCCN-*)C(-*)=O	1	NIL	N/A	NIL	N/A	MIC(μg/mL)	Alcaligenes	8	(IFO 12669)	(waterborne)
17	ɛ-poly-L-lysine (n=25~30)	3.5	N/A	*-H	*-H	NC(CCCCN-*)C(-*)=O	1	NIL	N/A	NIL	N/A	MIC(μg/mL)	Bacillus brevis	3	(IFO 3331)	(waterborne)
17	ɛ-poly-L-lysine (n=25~30)	3.5	N/A	*-H	*-H	NC(CCCCN-*)C(-*)=O	1	NIL	N/A	NIL	N/A	MIC(μg/mL)	B. subtilis	1	(IFO 12210)	(waterborne)
17	ɛ-poly-L-lysine (n=25~30)	3.5	N/A	*-H	*-H	NC(CCCCN-*)C(-*)=O	1	NIL	N/A	NIL	N/A	MIC(μg/mL)	B. cereus	16	(IFO 3514)	(waterborne)
18	α-poly-L-lysine (n=50)	6.4	N/A	*-H	*-H	NCCCCC(N-*)C(-*)=O	1	NIL	N/A	NIL	N/A	MIC(μg/mL)	Arthrobacter simplex	8	(IFO 12609)	(waterborne)
18	α-poly-L-lysine (n=50)	6.4	N/A	*-H	*-H	NCCCCC(N-*)C(-*)=O	1	NIL	N/A	NIL	N/A	MIC(μg/mL)	A. globiformis	8	(IFO 12140)	(waterborne)
18	α-poly-L-lysine (n=50)	6.4	N/A	*-H	*-H	NCCCCC(N-*)C(-*)=O	1	NIL	N/A	NIL	N/A	MIC(μg/mL)	Corynebacterium xerosis	2	(IFO 12684)	(waterborne)
18	α-poly-L-lysine (n=50)	6.4	N/A	*-H	*-H	NCCCCC(N-*)C(-*)=O	1	NIL	N/A	NIL	N/A	MIC(μg/mL)	Micrococcus aurantiacus	8	(IFG 12422)	(waterborne)
18	α-poly-L-lysine (n=50)	6.4	N/A	*-H	*-H	NCCCCC(N-*)C(-*)=O	1	NIL	N/A	NIL	N/A	MIC(μg/mL)	M. roseus	3	(IFO 3768)	(waterborne)
18	α-poly-L-lysine (n=50)	6.4	N/A	*-H	*-H	NCCCCC(N-*)C(-*)=O	1	NIL	N/A	NIL	N/A	MIC(μg/mL)	M. lysodeikticus	2	(IFO 3333)	(waterborne)
18	α-poly-L-lysine (n=50)	6.4	N/A	*-H	*-H	NCCCCC(N-*)C(-*)=O	1	NIL	N/A	NIL	N/A	MIC(μg/mL)	M. luteus	4	(IFO 3232)	(waterborne)
18	α-poly-L-lysine (n=50)	6.4	N/A	*-H	*-H	NCCCCC(N-*)C(-*)=O	1	NIL	N/A	NIL	N/A	MIC(μg/mL)	S. aureus	4	(IFO 3060)	(waterborne)
18	α-poly-L-lysine (n=50)	6.4	N/A	*-H	*-H	NCCCCC(N-*)C(-*)=O	1	NIL	N/A	NIL	N/A	MIC(μg/mL)	Mycobacterium tuberculosis	32	607	(waterborne)
18	α-poly-L-lysine (n=50)	6.4	N/A	*-H	*-H	NCCCCC(N-*)C(-*)=O	1	NIL	N/A	NIL	N/A	MIC(μg/mL)	E. coli	8	(K-12 IFO 3301)	(waterborne)
18	α-poly-L-lysine (n=50)	6.4	N/A	*-H	*-H	NCCCCC(N-*)C(-*)=O	1	NIL	N/A	NIL	N/A	MIC(μg/mL)	E. coli	8	(F-2)	(waterborne)
18	α-poly-L-lysine (n=50)	6.4	N/A	*-H	*-H	NCCCCC(N-*)C(-*)=O	1	NIL	N/A	NIL	N/A	MIC(μg/mL)	E. coli	8	(B IFO 13168)	(waterborne)
18	α-poly-L-lysine (n=50)	6.4	N/A	*-H	*-H	NCCCCC(N-*)C(-*)=O	1	NIL	N/A	NIL	N/A	MIC(μg/mL)	E. coli	4	(C IFO 13892)	(waterborne)
18	α-poly-L-lysine (n=50)	6.4	N/A	*-H	*-H	NCCCCC(N-*)C(-*)=O	1	NIL	N/A	NIL	N/A	MIC(μg/mL)	Pseudomonas putida	8	(IFO 3738)	(waterborne)
18	α-poly-L-lysine (n=50)	6.4	N/A	*-H	*-H	NCCCCC(N-*)C(-*)=O	1	NIL	N/A	NIL	N/A	MIC(μg/mL)	P. aeruginosa	16	(IFO 3923)	(waterborne)
18	α-poly-L-lysine (n=50)	6.4	N/A	*-H	*-H	NCCCCC(N-*)C(-*)=O	1	NIL	N/A	NIL	N/A	MIC(μg/mL)	Proteus vulgaris	32	(IFO 3851)	(waterborne)
18	α-poly-L-lysine (n=50)	6.4	N/A	*-H	*-H	NCCCCC(N-*)C(-*)=O	1	NIL	N/A	NIL	N/A	MIC(μg/mL)	Serratia marcescens	>64	(IFO 12648)	(waterborne)
18	α-poly-L-lysine (n=50)	6.4	N/A	*-H	*-H	NCCCCC(N-*)C(-*)=O	1	NIL	N/A	NIL	N/A	MIC(μg/mL)	Aerobacter aerogenes	32	(IFO 3317)	(waterborne)
18	α-poly-L-lysine (n=50)	6.4	N/A	*-H	*-H	NCCCCC(N-*)C(-*)=O	1	NIL	N/A	NIL	N/A	MIC(μg/mL)	Alcaligenes faecalis	>64	(IFO 12669)	(waterborne)
18	α-poly-L-lysine (n=50)	6.4	N/A	*-H	*-H	NCCCCC(N-*)C(-*)=O	1	NIL	N/A	NIL	N/A	MIC(μg/mL)	Bacillus brevis	8	(IFO 3331)	(waterborne)
18	α-poly-L-lysine (n=50)	6.4	N/A	*-H	*-H	NCCCCC(N-*)C(-*)=O	1	NIL	N/A	NIL	N/A	MIC(μg/mL)	B. subtilis	4	(IFO 12210)	(waterborne)
18	α-poly-L-lysine (n=50)	6.4	N/A	*-H	*-H	NCCCCC(N-*)C(-*)=O	1	NIL	N/A	NIL	N/A	MIC(μg/mL)	B. cereus	32	(IFO 3514)	(waterborne)
18	α-poly-L-lysine (n=50)	6.4	N/A	*-H	*-H	NCCCCC(N-*)C(-*)=O	1	NIL	N/A	NIL	N/A	MIC(μg/mL)	A. globiformis	16	(IFO 12140)	(waterborne)
18	α-poly-L-lysine (n=50)	6.4	N/A	*-H	*-H	NCCCCC(N-*)C(-*)=O	1	NIL	N/A	NIL	N/A	MIC(μg/mL)	Corynebacterium xerosis	4	(IFO 12684)	(waterborne)
18	α-poly-L-lysine (n=50)	6.4	N/A	*-H	*-H	NCCCCC(N-*)C(-*)=O	1	NIL	N/A	NIL	N/A	MIC(μg/mL)	Micrococcus aurantiacus	8	(IFG 12422)	(waterborne)
18	α-poly-L-lysine (n=50)	6.4	N/A	*-H	*-H	NCCCCC(N-*)C(-*)=O	1	NIL	N/A	NIL	N/A	MIC(μg/mL)	M. luteus	4	(IFO 3232)	(waterborne)
18	α-poly-L-lysine (n=50)	6.4	N/A	*-H	*-H	NCCCCC(N-*)C(-*)=O	1	NIL	N/A	NIL	N/A	MIC(μg/mL)	Staphylococcus aureus	16	(IFO 3060)	(waterborne)
19	polyhexamethylene guanidine hydrochloride (PHGC)	3.52	N/A	*-H	*-H	[Cl-].*-NCCCCCCNC(=[NH2+])N-*	1	NIL	N/A	NIL	N/A	MIC(μg/mL)	B. subtilis	1.55
19	polyhexamethylene guanidine hydrochloride (PHGC)	3.52	N/A	*-H	*-H	[Cl-].*-NCCCCCCNC(=[NH2+])N-*	1	NIL	N/A	NIL	N/A	MIC(μg/mL)	Sarcina	1.55
19	polyhexamethylene guanidine hydrochloride (PHGC)	3.52	N/A	*-H	*-H	[Cl-].*-NCCCCCCNC(=[NH2+])N-*	1	NIL	N/A	NIL	N/A	MIC(μg/mL)	S. aureus	0.39
19	polyhexamethylene guanidine hydrochloride (PHGC)	3.52	N/A	*-H	*-H	[Cl-].*-NCCCCCCNC(=[NH2+])N-*	1	NIL	N/A	NIL	N/A	MIC(μg/mL)	Diplococci pneumomiae	1.55
19	polyhexamethylene guanidine hydrochloride (PHGC)	3.52	N/A	*-H	*-H	[Cl-].*-NCCCCCCNC(=[NH2+])N-*	1	NIL	N/A	NIL	N/A	MIC(μg/mL)	Escherchia	12.5
19	polyhexamethylene guanidine hydrochloride (PHGC)	3.52	N/A	*-H	*-H	[Cl-].*-NCCCCCCNC(=[NH2+])N-*	1	NIL	N/A	NIL	N/A	MIC(μg/mL)	Ps. aeruginose	3.12
19	polyhexamethylene guanidine hydrochloride (PHGC)	3.52	N/A	*-H	*-H	[Cl-].*-NCCCCCCNC(=[NH2+])N-*	1	NIL	N/A	NIL	N/A	MIC(μg/mL)	Rhizopus niger	0.78
19	polyhexamethylene guanidine hydrochloride (PHGC)	3.52	N/A	*-H	*-H	[Cl-].*-NCCCCCCNC(=[NH2+])N-*	1	NIL	N/A	NIL	N/A	MIC(μg/mL)	Aspergillus niger	6.25
19	polyhexamethylene guanidine hydrochloride (PHGC)	3.52	N/A	*-H	*-H	[Cl-].*-NCCCCCCNC(=[NH2+])N-*	1	NIL	N/A	NIL	N/A	MIC(μg/mL)	Saccharomyces cerivisiae	0.78
19	polyhexamethylene guanidine hydrochloride (PHGC)	3.52	N/A	*-H	*-H	[Cl-].*-NCCCCCCNC(=[NH2+])N-*	1	NIL	N/A	NIL	N/A	MIC(μg/mL)	Candida albicans	0.39
20	polyhexamethylene biguanidine hydrochloride (PHBGC)	1.32	N/A	*-H	*-H	[Cl-].[Cl-].*-NCCCCCCNC(=[NH2+])NC(=[NH2+])N-*	1	NIL	N/A	NIL	N/A	MIC(μg/mL)	B. subtilis	0.78
20	polyhexamethylene biguanidine hydrochloride (PHBGC)	1.32	N/A	*-H	*-H	[Cl-].[Cl-].*-NCCCCCCNC(=[NH2+])NC(=[NH2+])N-*	1	NIL	N/A	NIL	N/A	MIC(μg/mL)	Sarcina	0.78
20	polyhexamethylene biguanidine hydrochloride (PHBGC)	1.32	N/A	*-H	*-H	[Cl-].[Cl-].*-NCCCCCCNC(=[NH2+])NC(=[NH2+])N-*	1	NIL	N/A	NIL	N/A	MIC(μg/mL)	S. aureus	0.39
20	polyhexamethylene biguanidine hydrochloride (PHBGC)	1.32	N/A	*-H	*-H	[Cl-].[Cl-].*-NCCCCCCNC(=[NH2+])NC(=[NH2+])N-*	1	NIL	N/A	NIL	N/A	MIC(μg/mL)	Diplococci pneumomiae	0.78
20	polyhexamethylene biguanidine hydrochloride (PHBGC)	1.32	N/A	*-H	*-H	[Cl-].[Cl-].*-NCCCCCCNC(=[NH2+])NC(=[NH2+])N-*	1	NIL	N/A	NIL	N/A	MIC(μg/mL)	Escherchia	25
20	polyhexamethylene biguanidine hydrochloride (PHBGC)	1.32	N/A	*-H	*-H	[Cl-].[Cl-].*-NCCCCCCNC(=[NH2+])NC(=[NH2+])N-*	1	NIL	N/A	NIL	N/A	MIC(μg/mL)	Ps. aeruginose	3.12
20	polyhexamethylene biguanidine hydrochloride (PHBGC)	1.32	N/A	*-H	*-H	[Cl-].[Cl-].*-NCCCCCCNC(=[NH2+])NC(=[NH2+])N-*	1	NIL	N/A	NIL	N/A	MIC(μg/mL)	Rhizopus niger	3.12
20	polyhexamethylene biguanidine hydrochloride (PHBGC)	1.32	N/A	*-H	*-H	[Cl-].[Cl-].*-NCCCCCCNC(=[NH2+])NC(=[NH2+])N-*	1	NIL	N/A	NIL	N/A	MIC(μg/mL)	Aspergillus niger	6.25
20	polyhexamethylene biguanidine hydrochloride (PHBGC)	1.32	N/A	*-H	*-H	[Cl-].[Cl-].*-NCCCCCCNC(=[NH2+])NC(=[NH2+])N-*	1	NIL	N/A	NIL	N/A	MIC(μg/mL)	Saccharomyces cerivisiae	1.55
20	polyhexamethylene biguanidine hydrochloride (PHBGC)	1.32	N/A	*-H	*-H	[Cl-].[Cl-].*-NCCCCCCNC(=[NH2+])NC(=[NH2+])N-*	1	NIL	N/A	NIL	N/A	MIC(μg/mL)	Candida albicans	0.78
21	polyhexamethylene guanidine stearate (PHGS)	N/A	N/A	*-H	*-H	CCCCCCCCCCCCCCCCCC(=O)ON=C(N-*)NCCCCCCN-*	1	NIL	N/A	NIL	N/A	MIC(μg/mL)	B. subtilis	6.25
21	polyhexamethylene guanidine stearate (PHGS)	N/A	N/A	*-H	*-H	CCCCCCCCCCCCCCCCCC(=O)ON=C(N-*)NCCCCCCN-*	1	NIL	N/A	NIL	N/A	MIC(μg/mL)	Sarcina	12.5
21	polyhexamethylene guanidine stearate (PHGS)	N/A	N/A	*-H	*-H	CCCCCCCCCCCCCCCCCC(=O)ON=C(N-*)NCCCCCCN-*	1	NIL	N/A	NIL	N/A	MIC(μg/mL)	S. aureus	12.5
21	polyhexamethylene guanidine stearate (PHGS)	N/A	N/A	*-H	*-H	CCCCCCCCCCCCCCCCCC(=O)ON=C(N-*)NCCCCCCN-*	1	NIL	N/A	NIL	N/A	MIC(μg/mL)	Diplococci pneumomiae	25
21	polyhexamethylene guanidine stearate (PHGS)	N/A	N/A	*-H	*-H	CCCCCCCCCCCCCCCCCC(=O)ON=C(N-*)NCCCCCCN-*	1	NIL	N/A	NIL	N/A	MIC(μg/mL)	Escherchia	100
21	polyhexamethylene guanidine stearate (PHGS)	N/A	N/A	*-H	*-H	CCCCCCCCCCCCCCCCCC(=O)ON=C(N-*)NCCCCCCN-*	1	NIL	N/A	NIL	N/A	MIC(μg/mL)	Ps. aeruginose	100
21	polyhexamethylene guanidine stearate (PHGS)	N/A	N/A	*-H	*-H	CCCCCCCCCCCCCCCCCC(=O)ON=C(N-*)NCCCCCCN-*	1	NIL	N/A	NIL	N/A	MIC(μg/mL)	Rhizopus niger	12.5
21	polyhexamethylene guanidine stearate (PHGS)	N/A	N/A	*-H	*-H	CCCCCCCCCCCCCCCCCC(=O)ON=C(N-*)NCCCCCCN-*	1	NIL	N/A	NIL	N/A	MIC(μg/mL)	Aspergillus niger	12.5
21	polyhexamethylene guanidine stearate (PHGS)	N/A	N/A	*-H	*-H	CCCCCCCCCCCCCCCCCC(=O)ON=C(N-*)NCCCCCCN-*	1	NIL	N/A	NIL	N/A	MIC(μg/mL)	Saccharomyces cerivisiae	6.25
21	polyhexamethylene guanidine stearate (PHGS)	N/A	N/A	*-H	*-H	CCCCCCCCCCCCCCCCCC(=O)ON=C(N-*)NCCCCCCN-*	1	NIL	N/A	NIL	N/A	MIC(μg/mL)	Candida albicans	0.39
22	polyhexamethylene biguanidine stearate (PHBGS)	N/A	N/A	*-H	*-H	CCCCCCCCCCCCCCCCCC(=O)ON=C(N-*)NC(NCCCCCCN-*)=NOC(=O)CCCCCCCCCCCCCCCCC	1	NIL	N/A	NIL	N/A	MIC(μg/mL)	B. subtilis	50
22	polyhexamethylene biguanidine stearate (PHBGS)	N/A	N/A	*-H	*-H	CCCCCCCCCCCCCCCCCC(=O)ON=C(N-*)NC(NCCCCCCN-*)=NOC(=O)CCCCCCCCCCCCCCCCC	1	NIL	N/A	NIL	N/A	MIC(μg/mL)	Sarcina	50
22	polyhexamethylene biguanidine stearate (PHBGS)	N/A	N/A	*-H	*-H	CCCCCCCCCCCCCCCCCC(=O)ON=C(N-*)NC(NCCCCCCN-*)=NOC(=O)CCCCCCCCCCCCCCCCC	1	NIL	N/A	NIL	N/A	MIC(μg/mL)	S. aureus	0.78
22	polyhexamethylene biguanidine stearate (PHBGS)	N/A	N/A	*-H	*-H	CCCCCCCCCCCCCCCCCC(=O)ON=C(N-*)NC(NCCCCCCN-*)=NOC(=O)CCCCCCCCCCCCCCCCC	1	NIL	N/A	NIL	N/A	MIC(μg/mL)	Diplococci pneumomiae	6.25
22	polyhexamethylene biguanidine stearate (PHBGS)	N/A	N/A	*-H	*-H	CCCCCCCCCCCCCCCCCC(=O)ON=C(N-*)NC(NCCCCCCN-*)=NOC(=O)CCCCCCCCCCCCCCCCC	1	NIL	N/A	NIL	N/A	MIC(μg/mL)	Escherchia	200
22	polyhexamethylene biguanidine stearate (PHBGS)	N/A	N/A	*-H	*-H	CCCCCCCCCCCCCCCCCC(=O)ON=C(N-*)NC(NCCCCCCN-*)=NOC(=O)CCCCCCCCCCCCCCCCC	1	NIL	N/A	NIL	N/A	MIC(μg/mL)	Ps. aeruginose	50
22	polyhexamethylene biguanidine stearate (PHBGS)	N/A	N/A	*-H	*-H	CCCCCCCCCCCCCCCCCC(=O)ON=C(N-*)NC(NCCCCCCN-*)=NOC(=O)CCCCCCCCCCCCCCCCC	1	NIL	N/A	NIL	N/A	MIC(μg/mL)	Rhizopus niger	12.5
22	polyhexamethylene biguanidine stearate (PHBGS)	N/A	N/A	*-H	*-H	CCCCCCCCCCCCCCCCCC(=O)ON=C(N-*)NC(NCCCCCCN-*)=NOC(=O)CCCCCCCCCCCCCCCCC	1	NIL	N/A	NIL	N/A	MIC(μg/mL)	Aspergillus niger	12.5
22	polyhexamethylene biguanidine stearate (PHBGS)	N/A	N/A	*-H	*-H	CCCCCCCCCCCCCCCCCC(=O)ON=C(N-*)NC(NCCCCCCN-*)=NOC(=O)CCCCCCCCCCCCCCCCC	1	NIL	N/A	NIL	N/A	MIC(μg/mL)	Saccharomyces cerivisiae	1.55
22	polyhexamethylene biguanidine stearate (PHBGS)	N/A	N/A	*-H	*-H	CCCCCCCCCCCCCCCCCC(=O)ON=C(N-*)NC(NCCCCCCN-*)=NOC(=O)CCCCCCCCCCCCCCCCC	1	NIL	N/A	NIL	N/A	MIC(μg/mL)	Candida albicans	1.55
23	PAEMA	1.4	N/A	COC(=O)CCS-*	*-H	[Cl-].CC(-*)(C-*)C(=O)OCC[NH3+]	1	NIL	N/A	NIL	N/A	MIC(μg/mL)	E. coli	>2000	(waterborne)
24	PMMA-co-PAEMA.HCl	1.1	N/A	COC(=O)CCS-*	*-H	[Cl-].CC(-*)(C-*)C(=O)OCC[NH3+]	0.82	COC(=O)C(C)(-*)C-*	0.18	NIL	N/A	MIC(μg/mL)	E. coli	1000	(waterborne)
25	PMMA-co-PAEMA.HCl	1.2	N/A	COC(=O)CCS-*	*-H	[Cl-].CC(-*)(C-*)C(=O)OCC[NH3+]	0.77	COC(=O)C(C)(-*)C-*	0.23	NIL	N/A	MIC(μg/mL)	E. coli	320	(waterborne)
26	PMMA-co-PAEMA.HCl	1.1	N/A	COC(=O)CCS-*	*-H	[Cl-].CC(-*)(C-*)C(=O)OCC[NH3+]	0.71	COC(=O)C(C)(-*)C-*	0.29	NIL	N/A	MIC(μg/mL)	E. coli	55	(waterborne)
27	PMMA-co-PAEMA.HCl	1	N/A	COC(=O)CCS-*	*-H	[Cl-].CC(-*)(C-*)C(=O)OCC[NH3+]	0.6	COC(=O)C(C)(-*)C-*	0.4	NIL	N/A	MIC(μg/mL)	E. coli	21	(fmethyl=0.4) (DP=6.4) (Mn(kDa)=1)
28	PMMA-co-PAEMA.HCl	1	N/A	COC(=O)CCS-*	*-H	[Cl-].CC(-*)(C-*)C(=O)OCC[NH3+]	0.53	COC(=O)C(C)(-*)C-*	0.47	NIL	N/A	MIC(μg/mL)	E. coli	16	(fmethyl=0.47) (DP=6.2) (Mn(kDa)=1)
29	PMMA-co-PAEMA.HCl	1.5	N/A	COC(=O)CCS-*	*-H	[Cl-].CC(-*)(C-*)C(=O)OCC[NH3+]	0.48	COC(=O)C(C)(-*)C-*	0.52	NIL	N/A	MIC(μg/mL)	E. coli	17	(fmethyl=0.52) (DP=10.3) (Mn(kDa)=1.5)
30	PMMA-co-PAEMA.HCl	1.2	N/A	COC(=O)CCS-*	*-H	[Cl-].CC(-*)(C-*)C(=O)OCC[NH3+]	0.41	COC(=O)C(C)(-*)C-*	0.59	NIL	N/A	MIC(μg/mL)	E. coli	11	(fmethyl=0.59) (DP=8.2) (Mn(kDa)=1.2)
31	PMMA-co-PAEMA.HCl	1.1	N/A	COC(=O)CCS-*	*-H	[Cl-].CC(-*)(C-*)C(=O)OCC[NH3+]	0.35	COC(=O)C(C)(-*)C-*	0.65	NIL	N/A	MIC(μg/mL)	E. coli	8.1	(fmethyl=0.65) (DP=7.6) (Mn(kDa)=1.1)
32	T0	1.6	N/A	COC(=O)CCS-*	*-H	[Cl-].C[NH+](C)CCOC(=O)C(C)(-*)C-*	1	NIL	N/A	NIL	N/A	MIC(μg/mL)	E. coli	>2000	(fmethyl=0) (DP=7.7) (Mn(kDa)=1.6)
33	PMMA-co-PDMAEMA.HCl	1.5	N/A	COC(=O)CCS-*	*-H	[Cl-].C[NH+](C)CCOC(=O)C(C)(-*)C-*	0.81	COC(=O)C(C)(-*)C-*	0.19	NIL	N/A	MIC(μg/mL)	E. coli	1400	(waterborne)
34	PMMA-co-PDMAEMA.HCl	1.4	N/A	COC(=O)CCS-*	*-H	[Cl-].C[NH+](C)CCOC(=O)C(C)(-*)C-*	0.74	COC(=O)C(C)(-*)C-*	0.26	NIL	N/A	MIC(μg/mL)	E. coli	690	(fmethyl=0.26) (DP=7.6) (Mn(kDa)=1.4)
35	PMMA-co-PDMAEMA.HCl	1.4	N/A	COC(=O)CCS-*	*-H	[Cl-].C[NH+](C)CCOC(=O)C(C)(-*)C-*	0.62	COC(=O)C(C)(-*)C-*	0.38	NIL	N/A	MIC(μg/mL)	E. coli	340	(fmethyl=0.38) (DP=8.2) (Mn(kDa)=1.4)
36	PMMA-co-PDMAEMA.HCl	1	N/A	COC(=O)CCS-*	*-H	[Cl-].C[NH+](C)CCOC(=O)C(C)(-*)C-*	0.54	COC(=O)C(C)(-*)C-*	0.46	NIL	N/A	MIC(μg/mL)	E. coli	260	(fmethyl=0.46) (DP=6.7) (Mn(kDa)=1)
37	PMMA-co-PDMAEMA.HCl	1.1	N/A	COC(=O)CCS-*	*-H	[Cl-].C[NH+](C)CCOC(=O)C(C)(-*)C-*	0.49	COC(=O)C(C)(-*)C-*	0.51	NIL	N/A	MIC(μg/mL)	E. coli	242	(fmethyl=0.51) (DP=7.1) (Mn(kDa)=1.1)
38	PMMA-co-PDMAEMA.HCl	1.1	N/A	COC(=O)CCS-*	*-H	[Cl-].C[NH+](C)CCOC(=O)C(C)(-*)C-*	0.48	COC(=O)C(C)(-*)C-*	0.52	NIL	N/A	MIC(μg/mL)	E. coli	319	(fmethyl=0.52) (DP=7.1) (Mn(kDa)=1.1)
39	PMMA-co-PDMAEMA.HCl	1.2	N/A	COC(=O)CCS-*	*-H	[Cl-].C[NH+](C)CCOC(=O)C(C)(-*)C-*	0.39	COC(=O)C(C)(-*)C-*	0.61	NIL	N/A	MIC(μg/mL)	E. coli	840	(fmethyl=0.61) (DP=7.9) (Mn(kDa)=1.2)
40	PMMA-co-PDMAEMA.HCl	1.3	N/A	COC(=O)CCS-*	*-H	[Cl-].C[NH+](C)CCOC(=O)C(C)(-*)C-*	0.29	COC(=O)C(C)(-*)C-*	0.71	NIL	N/A	MIC(μg/mL)	E. coli	>2000	(fmethyl=0.71) (DP=9.5) (Mn(kDa)=1 .3)
41	Q0	2.3	N/A	COC(=O)CCS-*	*-H	[I-].CC(-*)(C-*)C(=O)OCC[N+](C)(C)C	1	NIL	N/A	NIL	N/A	MIC(μg/mL)	E. coli	>2000	(fmethyl=0) (DP=7.4) (Mn(kDa)=2.3)
42	QM23	1.9	N/A	COC(=O)CCS-*	*-H	[I-].CC(-*)(C-*)C(=O)OCC[N+](C)(C)C	0.73	COC(=O)C(C)(-*)C-*	0.23	NIL	N/A	MIC(μg/mL)	E. coli	>2000	(fmethyl=0.23) (DP=7) (Mn(kDa)=1.9)
43	QM30	1.7	N/A	COC(=O)CCS-*	*-H	[I-].CC(-*)(C-*)C(=O)OCC[N+](C)(C)C	0.7	COC(=O)C(C)(-*)C-*	0.3	NIL	N/A	MIC(μg/mL)	E. coli	>2000	(fmethyl=0.3) (DP=6.4) (Mn(kDa)=1.7)
44	QM38	1.6	N/A	COC(=O)CCS-*	*-H	[I-].CC(-*)(C-*)C(=O)OCC[N+](C)(C)C	0.62	COC(=O)C(C)(-*)C-*	0.38	NIL	N/A	MIC(μg/mL)	E. coli	>2000	(fmethyl=0.38) (DP=6.6) (Mn(kDa)=1.6)
45	QM48	1.5	N/A	COC(=O)CCS-*	*-H	[I-].CC(-*)(C-*)C(=O)OCC[N+](C)(C)C	0.52	COC(=O)C(C)(-*)C-*	0.48	NIL	N/A	MIC(μg/mL)	E. coli	>2000	(fmethyl=0.38) (DP=6.6) (Mn(kDa)=1.6)
46	QM54	1.5	N/A	COC(=O)CCS-*	*-H	[I-].CC(-*)(C-*)C(=O)OCC[N+](C)(C)C	0.46	COC(=O)C(C)(-*)C-*	0.54	NIL	N/A	MIC(μg/mL)	E. coli	>2000	(fmethyl=0.54) (DP=7.1) (Mn(kDa)=1.5)
47	QM57	1.3	N/A	COC(=O)CCS-*	*-H	[I-].CC(-*)(C-*)C(=O)OCC[N+](C)(C)C	0.43	COC(=O)C(C)(-*)C-*	0.57	NIL	N/A	MIC(μg/mL)	E. coli	>2000	(fmethyl=0.57) (DP=6.5) (Mn(kDa)=1.3)
48	QM63	1.3	N/A	COC(=O)CCS-*	*-H	[I-].CC(-*)(C-*)C(=O)OCC[N+](C)(C)C	0.37	COC(=O)C(C)(-*)C-*	0.63	NIL	N/A	MIC(μg/mL)	E. coli	>2000	(fmethyl=0.63) (DP=6.6) (Mn(kDa)=1.3)
49	QM65	1.3	N/A	COC(=O)CCS-*	*-H	[I-].CC(-*)(C-*)C(=O)OCC[N+](C)(C)C	0.35	COC(=O)C(C)(-*)C-*	0.65	NIL	N/A	MIC(μg/mL)	E. coli	>2000	(fmethyl=0.65) (DP=6.8) (Mn(kDa)=1 .3)
50	PB20	2	N/A	COC(=O)CCS-*	*-H	[Cl-].CC(-*)(C-*)C(=O)OCC[NH3+]	0.8	CCCCOC(=O)C(C)(-*)C-*	0.2	NIL	N/A	MIC(μg/mL)	E. coli	8	(fbutyl=0.2) (DP=11.4) (Mn(kDa)=2)
51	PB31	1.4	N/A	COC(=O)CCS-*	*-H	[Cl-].CC(-*)(C-*)C(=O)OCC[NH3+]	0.69	CCCCOC(=O)C(C)(-*)C-*	0.31	NIL	N/A	MIC(μg/mL)	E. coli	7.7	(fbutyl=0.31) (DP=8.2) (Mn(kDa)=1.4)
52	PB34	1.2	N/A	COC(=O)CCS-*	*-H	[Cl-].CC(-*)(C-*)C(=O)OCC[NH3+]	0.66	CCCCOC(=O)C(C)(-*)C-*	0.34	NIL	N/A	MIC(μg/mL)	E. coli	7.8	(fbutyl=0.34) (DP=8.2) (Mn(kDa)=1.4)
53	PB37	1.8	N/A	COC(=O)CCS-*	*-H	[Cl-].CC(-*)(C-*)C(=O)OCC[NH3+]	0.66	CCCCOC(=O)C(C)(-*)C-*	0.34	NIL	N/A	MIC(μg/mL)	E. coli	7.7	(fbutyl=0.37) (DP=10.7) (Mn(kDa)=1.8)
54	PB40	1.4	N/A	COC(=O)CCS-*	*-H	[Cl-].CC(-*)(C-*)C(=O)OCC[NH3+]	0.6	CCCCOC(=O)C(C)(-*)C-*	0.4	NIL	N/A	MIC(μg/mL)	E. coli	7.6	(fbutyl=0.4) (DP=8.4) (Mn(kDa)=1.4)
55	PB42	1.5	N/A	COC(=O)CCS-*	*-H	[Cl-].CC(-*)(C-*)C(=O)OCC[NH3+]	0.58	CCCCOC(=O)C(C)(-*)C-*	0.42	NIL	N/A	MIC(μg/mL)	E. coli	7.7	(fbutyl=0.42) (DP=9) (Mn(kDa)=1.5)
56	TB12	1.6	N/A	COC(=O)CCS-*	*-H	[Cl-].C[NH+](C)CCOC(=O)C(C)(-*)C-*	0.88	CCCCOC(=O)C(C)(-*)C-*	0.12	NIL	N/A	MIC(μg/mL)	E. coli	24	(fbutyl=0.12) (DP=8.1) (Mn(kDa)=1.6)
57	TB19	1.8	N/A	COC(=O)CCS-*	*-H	[Cl-].C[NH+](C)CCOC(=O)C(C)(-*)C-*	0.81	CCCCOC(=O)C(C)(-*)C-*	0.19	NIL	N/A	MIC(μg/mL)	E. coli	7.9	(fbutyl=0.19) (DP=9.3) (Mn(kDa)=1.8)
58	TB23	1.6	N/A	COC(=O)CCS-*	*-H	[Cl-].C[NH+](C)CCOC(=O)C(C)(-*)C-*	0.77	CCCCOC(=O)C(C)(-*)C-*	0.23	NIL	N/A	MIC(μg/mL)	E. coli	3.8	(fbutyl=0.23) (DP=8.6) (Mn(kDa)=1.6)
59	TB26	1.7	N/A	COC(=O)CCS-*	*-H	[Cl-].C[NH+](C)CCOC(=O)C(C)(-*)C-*	0.74	CCCCOC(=O)C(C)(-*)C-*	0.26	NIL	N/A	MIC(μg/mL)	E. coli	3.9	(fbutyl=0.26) (DP=9.1) (Mn(kDa)=1.7)
60	TB28	1.6	N/A	COC(=O)CCS-*	*-H	[Cl-].C[NH+](C)CCOC(=O)C(C)(-*)C-*	0.72	CCCCOC(=O)C(C)(-*)C-*	0.28	NIL	N/A	MIC(μg/mL)	E. coli	4	(fbutyl=0.28) (DP=8.4) (Mn(kDa)=1.6)
61	TB36	1.6	N/A	COC(=O)CCS-*	*-H	[Cl-].C[NH+](C)CCOC(=O)C(C)(-*)C-*	0.64	CCCCOC(=O)C(C)(-*)C-*	0.36	NIL	N/A	MIC(μg/mL)	E. coli	7.7	(fbutyl=0.36) (DP=8.8) (Mn(kDa)=1.6)
62	TB42	1.5	N/A	COC(=O)CCS-*	*-H	[Cl-].C[NH+](C)CCOC(=O)C(C)(-*)C-*	0.58	CCCCOC(=O)C(C)(-*)C-*	0.42	NIL	N/A	MIC(μg/mL)	E. coli	24	(fbutyl=0.42) (DP=8.2) (Mn(kDa)=1.5)
63	QB22	3.5	N/A	COC(=O)CCS-*	*-H	[I-].CC(-*)(C-*)C(=O)OCC[N+](C)(C)C	0.78	CCCCOC(=O)C(C)(-*)C-*	0.22	NIL	N/A	MIC(μg/mL)	E. coli	1700	(fbutyl=0.22) (DP=1 1.8) (Mn(kDa)=3.5)
64	QB26	2.7	N/A	COC(=O)CCS-*	*-H	[I-].CC(-*)(C-*)C(=O)OCC[N+](C)(C)C	0.74	CCCCOC(=O)C(C)(-*)C-*	0.26	NIL	N/A	MIC(μg/mL)	E. coli	300	(fbutyl=0.26) (DP=9.8) (Mn(kDa)=2.7)
65	QB31	1.9	N/A	COC(=O)CCS-*	*-H	[I-].CC(-*)(C-*)C(=O)OCC[N+](C)(C)C	0.69	CCCCOC(=O)C(C)(-*)C-*	0.31	NIL	N/A	MIC(μg/mL)	E. coli	46	(fbutyl=0.31) (DP=7) (Mn(kDa)=1.9)
66	QB35	3.5	N/A	COC(=O)CCS-*	*-H	[I-].CC(-*)(C-*)C(=O)OCC[N+](C)(C)C	0.65	CCCCOC(=O)C(C)(-*)C-*	0.35	NIL	N/A	MIC(μg/mL)	E. coli	95	(fbutyl=0.35) (DP=13.4) (Mn(kDa)=3.5)
67	QB37	2.4	N/A	COC(=O)CCS-*	*-H	[I-].CC(-*)(C-*)C(=O)OCC[N+](C)(C)C	0.63	CCCCOC(=O)C(C)(-*)C-*	0.37	NIL	N/A	MIC(μg/mL)	E. coli	34	(fbutyl=0.37) (DP=9.3) (Mn(kDa)=2.4)
68	QB39	1.5	N/A	COC(=O)CCS-*	*-H	[I-].CC(-*)(C-*)C(=O)OCC[N+](C)(C)C	0.61	CCCCOC(=O)C(C)(-*)C-*	0.39	NIL	N/A	MIC(μg/mL)	E. coli	39	(fbutyl=0.39) (DP=6) (Mn(kDa)=1.5)
69	QB44	2.3	N/A	COC(=O)CCS-*	*-H	[I-].CC(-*)(C-*)C(=O)OCC[N+](C)(C)C	0.56	CCCCOC(=O)C(C)(-*)C-*	0.44	NIL	N/A	MIC(μg/mL)	E. coli	39	(fbutyl=0.44) (DP=8.9) (Mn(kDa)=2.3)
70	poly(4-vinyl-N-hexylpyridinium bromide)	160	N/A	*-H	*-H	[Br-].CCCCCC[N+]1=CC=C(C=C)C=C1	1	NIL	N/A	NIL	N/A	% of bacterial killed	S. aureus	94
70	poly(4-vinyl-N-hexylpyridinium bromide)	160	N/A	*-H	*-H	[Br-].CCCCCC[N+]1=CC=C(C=C)C=C1	1	NIL	N/A	NIL	N/A	% of bacterial killed	S. epidermidis	>99
70	poly(4-vinyl-N-hexylpyridinium bromide)	160	N/A	*-H	*-H	[Br-].CCCCCC[N+]1=CC=C(C=C)C=C1	1	NIL	N/A	NIL	N/A	% of bacterial killed	P. aeruginosa	>99.8
70	poly(4-vinyl-N-hexylpyridinium bromide)	160	N/A	*-H	*-H	[Br-].CCCCCC[N+]1=CC=C(C=C)C=C1	1	NIL	N/A	NIL	N/A	% of bacterial killed	E. coli	>99
71	PrBr(MeImdz)	N/A	N/A	*-OCC1=CC=CC=C1	*-H	[Br-].CN1C=C[N+](CCCOC(=O)C(C)(CO-*)COC(-*)=O)=C1	1	NIL	N/A	NIL	N/A	MIC(μg/mL)	S. aureus	500	(Gram +)
71	PrBr(MeImdz)	N/A	N/A	*-OCC1=CC=CC=C1	*-H	[Br-].CN1C=C[N+](CCCOC(=O)C(C)(CO-*)COC(-*)=O)=C1	1	NIL	N/A	NIL	N/A	MIC(μg/mL)	E. coli	1000	(Gram −)
71	PrBr(MeImdz)	N/A	N/A	*-OCC1=CC=CC=C1	*-H	[Br-].CN1C=C[N+](CCCOC(=O)C(C)(CO-*)COC(-*)=O)=C1	1	NIL	N/A	NIL	N/A	MIC(μg/mL)	P. aeruginosa	>1000	(Gram −)
71	PrBr(MeImdz)	N/A	N/A	*-OCC1=CC=CC=C1	*-H	[Br-].CN1C=C[N+](CCCOC(=O)C(C)(CO-*)COC(-*)=O)=C1	1	NIL	N/A	NIL	N/A	MIC(μg/mL)	C. albicans	250	(fungus)
72	PrBr(EtImdz)	N/A	N/A	*-OCC1=CC=CC=C1	*-H	[Br-].CCN1C=C[N+](CCCOC(=O)C(C)(CO-*)COC(-*)=O)=C1	1	NIL	N/A	NIL	N/A	MIC(μg/mL)	S. aureus	31	(Gram +)
72	PrBr(EtImdz)	N/A	N/A	*-OCC1=CC=CC=C1	*-H	[Br-].CCN1C=C[N+](CCCOC(=O)C(C)(CO-*)COC(-*)=O)=C1	1	NIL	N/A	NIL	N/A	MIC(μg/mL)	E. coli	250	(Gram −)
72	PrBr(EtImdz)	N/A	N/A	*-OCC1=CC=CC=C1	*-H	[Br-].CCN1C=C[N+](CCCOC(=O)C(C)(CO-*)COC(-*)=O)=C1	1	NIL	N/A	NIL	N/A	MIC(μg/mL)	P. aeruginosa	>1000	(Gram −)
72	PrBr(EtImdz)	N/A	N/A	*-OCC1=CC=CC=C1	*-H	[Br-].CCN1C=C[N+](CCCOC(=O)C(C)(CO-*)COC(-*)=O)=C1	1	NIL	N/A	NIL	N/A	MIC(μg/mL)	C. albicans	250	(fungus)
73	PrBr(BuImdz)	N/A	N/A	*-OCC1=CC=CC=C1	*-H	[Br-].CCCCN1C=C[N+](CCCOC(=O)C(C)(CO-*)COC(-*)=O)=C1	1	NIL	N/A	NIL	N/A	MIC(μg/mL)	S. aureus	8	(Gram +)
73	PrBr(BuImdz)	N/A	N/A	*-OCC1=CC=CC=C1	*-H	[Br-].CCCCN1C=C[N+](CCCOC(=O)C(C)(CO-*)COC(-*)=O)=C1	1	NIL	N/A	NIL	N/A	MIC(μg/mL)	E. coli	31	(Gram −)
73	PrBr(BuImdz)	N/A	N/A	*-OCC1=CC=CC=C1	*-H	[Br-].CCCCN1C=C[N+](CCCOC(=O)C(C)(CO-*)COC(-*)=O)=C1	1	NIL	N/A	NIL	N/A	MIC(μg/mL)	P. aeruginosa	250	(Gram −)
73	PrBr(BuImdz)	N/A	N/A	*-OCC1=CC=CC=C1	*-H	[Br-].CCCCN1C=C[N+](CCCOC(=O)C(C)(CO-*)COC(-*)=O)=C1	1	NIL	N/A	NIL	N/A	MIC(μg/mL)	C. albicans	250	(fungus)
74	PrBr(Pyr)	N/A	N/A	*-OCC1=CC=CC=C1	*-H	[Br-].CC(CO-*)(COC(-*)=O)C(=O)OCCC[N+]1=CC=CC=C1	1	NIL	N/A	NIL	N/A	MIC(μg/mL)	S. aureus	63	(Gram +)
74	PrBr(Pyr)	N/A	N/A	*-OCC1=CC=CC=C1	*-H	[Br-].CC(CO-*)(COC(-*)=O)C(=O)OCCC[N+]1=CC=CC=C1	1	NIL	N/A	NIL	N/A	MIC(μg/mL)	E. coli	125	(Gram −)
74	PrBr(Pyr)	N/A	N/A	*-OCC1=CC=CC=C1	*-H	[Br-].CC(CO-*)(COC(-*)=O)C(=O)OCCC[N+]1=CC=CC=C1	1	NIL	N/A	NIL	N/A	MIC(μg/mL)	P. aeruginosa	1000	(Gram −)
74	PrBr(Pyr)	N/A	N/A	*-OCC1=CC=CC=C1	*-H	[Br-].CC(CO-*)(COC(-*)=O)C(=O)OCCC[N+]1=CC=CC=C1	1	NIL	N/A	NIL	N/A	MIC(μg/mL)	C. albicans	125	(fungus)
75	PrBr(DMAP)	N/A	N/A	*-OCC1=CC=CC=C1	*-H	[Br-].CN(C)C1=CC=[N+](CCCOC(=O)C(C)(CO-*)COC(-*)=O)C=C1	1	NIL	N/A	NIL	N/A	MIC(μg/mL)	S. aureus	8	(Gram +)
75	PrBr(DMAP)	N/A	N/A	*-OCC1=CC=CC=C1	*-H	[Br-].CN(C)C1=CC=[N+](CCCOC(=O)C(C)(CO-*)COC(-*)=O)C=C1	1	NIL	N/A	NIL	N/A	MIC(μg/mL)	E. coli	63	(Gram −)
75	PrBr(DMAP)	N/A	N/A	*-OCC1=CC=CC=C1	*-H	[Br-].CN(C)C1=CC=[N+](CCCOC(=O)C(C)(CO-*)COC(-*)=O)C=C1	1	NIL	N/A	NIL	N/A	MIC(μg/mL)	P. aeruginosa	125	(Gram −)
75	PrBr(DMAP)	N/A	N/A	*-OCC1=CC=CC=C1	*-H	[Br-].CN(C)C1=CC=[N+](CCCOC(=O)C(C)(CO-*)COC(-*)=O)C=C1	1	NIL	N/A	NIL	N/A	MIC(μg/mL)	C. albicans	250	(fungus)
76	PrBr(TMA)*	N/A	N/A	*-OCC1=CC=CC=C1	*-H	[Br-].CC(CO-*)(COC(-*)=O)C(=O)OCCC[N+](C)(C)C	1	NIL	N/A	NIL	N/A	MIC(μg/mL)	S. aureus	500	(Gram +)
76	PrBr(TMA)*	N/A	N/A	*-OCC1=CC=CC=C1	*-H	[Br-].CC(CO-*)(COC(-*)=O)C(=O)OCCC[N+](C)(C)C	1	NIL	N/A	NIL	N/A	MIC(μg/mL)	E. coli	1000	(Gram −)
76	PrBr(TMA)*	N/A	N/A	*-OCC1=CC=CC=C1	*-H	[Br-].CC(CO-*)(COC(-*)=O)C(=O)OCCC[N+](C)(C)C	1	NIL	N/A	NIL	N/A	MIC(μg/mL)	P. aeruginosa	>1000	(Gram −)
76	PrBr(TMA)*	N/A	N/A	*-OCC1=CC=CC=C1	*-H	[Br-].CC(CO-*)(COC(-*)=O)C(=O)OCCC[N+](C)(C)C	1	NIL	N/A	NIL	N/A	MIC(μg/mL)	C. albicans	500	(fungus)
77	HexBr(MeImdz)	N/A	N/A	*-OCC1=CC=CC=C1	*-H	[Br-].CN1C=C[N+](CCCCCCOC(=O)C(C)(CO-*)COC(-*)=O)=C1	1	NIL	N/A	NIL	N/A	MIC(μg/mL)	S. aureus	4	(Gram +)
77	HexBr(MeImdz)	N/A	N/A	*-OCC1=CC=CC=C1	*-H	[Br-].CN1C=C[N+](CCCCCCOC(=O)C(C)(CO-*)COC(-*)=O)=C1	1	NIL	N/A	NIL	N/A	MIC(μg/mL)	E. coli	31	(Gram −)
77	HexBr(MeImdz)	N/A	N/A	*-OCC1=CC=CC=C1	*-H	[Br-].CN1C=C[N+](CCCCCCOC(=O)C(C)(CO-*)COC(-*)=O)=C1	1	NIL	N/A	NIL	N/A	MIC(μg/mL)	P. aeruginosa	250	(Gram −)
77	HexBr(MeImdz)	N/A	N/A	*-OCC1=CC=CC=C1	*-H	[Br-].CN1C=C[N+](CCCCCCOC(=O)C(C)(CO-*)COC(-*)=O)=C1	1	NIL	N/A	NIL	N/A	MIC(μg/mL)	C. albicans	125	(fungus)
78	HexBr(EtImdz)	N/A	N/A	*-OCC1=CC=CC=C1	*-H	[Br-].CCN1C=C[N+](CCCCCCOC(=O)C(C)(CO-*)COC(-*)=O)=C1	1	NIL	N/A	NIL	N/A	MIC(μg/mL)	S. aureus	4	(Gram +)
78	HexBr(EtImdz)	N/A	N/A	*-OCC1=CC=CC=C1	*-H	[Br-].CCN1C=C[N+](CCCCCCOC(=O)C(C)(CO-*)COC(-*)=O)=C1	1	NIL	N/A	NIL	N/A	MIC(μg/mL)	E. coli	16	(Gram −)
78	HexBr(EtImdz)	N/A	N/A	*-OCC1=CC=CC=C1	*-H	[Br-].CCN1C=C[N+](CCCCCCOC(=O)C(C)(CO-*)COC(-*)=O)=C1	1	NIL	N/A	NIL	N/A	MIC(μg/mL)	P. aeruginosa	250	(Gram −)
78	HexBr(EtImdz)	N/A	N/A	*-OCC1=CC=CC=C1	*-H	[Br-].CCN1C=C[N+](CCCCCCOC(=O)C(C)(CO-*)COC(-*)=O)=C1	1	NIL	N/A	NIL	N/A	MIC(μg/mL)	C. albicans	125	(fungus)
79	HexBr(BuImdz)	N/A	N/A	*-OCC1=CC=CC=C1	*-H	[Br-].CCCCN1C=C[N+](CCCCCCOC(=O)C(C)(CO-*)COC(-*)=O)=C1	1	NIL	N/A	NIL	N/A	MIC(μg/mL)	S. aureus	4	(Gram +)
79	HexBr(BuImdz)	N/A	N/A	*-OCC1=CC=CC=C1	*-H	[Br-].CCCCN1C=C[N+](CCCCCCOC(=O)C(C)(CO-*)COC(-*)=O)=C1	1	NIL	N/A	NIL	N/A	MIC(μg/mL)	E. coli	8	(Gram −)
79	HexBr(BuImdz)	N/A	N/A	*-OCC1=CC=CC=C1	*-H	[Br-].CCCCN1C=C[N+](CCCCCCOC(=O)C(C)(CO-*)COC(-*)=O)=C1	1	NIL	N/A	NIL	N/A	MIC(μg/mL)	P. aeruginosa	31	(Gram −)
79	HexBr(BuImdz)	N/A	N/A	*-OCC1=CC=CC=C1	*-H	[Br-].CCCCN1C=C[N+](CCCCCCOC(=O)C(C)(CO-*)COC(-*)=O)=C1	1	NIL	N/A	NIL	N/A	MIC(μg/mL)	C. albicans	125	(fungus)
80	HexBr(Pyr)	N/A	N/A	*-OCC1=CC=CC=C1	*-H	[Br-].CC(CO-*)(COC(-*)=O)C(=O)OCCCCCC[N+]1=CC=CC=C1	1	NIL	N/A	NIL	N/A	MIC(μg/mL)	S. aureus	4	(Gram +)
80	HexBr(Pyr)	N/A	N/A	*-OCC1=CC=CC=C1	*-H	[Br-].CC(CO-*)(COC(-*)=O)C(=O)OCCCCCC[N+]1=CC=CC=C1	1	NIL	N/A	NIL	N/A	MIC(μg/mL)	E. coli	31	(Gram −)
80	HexBr(Pyr)	N/A	N/A	*-OCC1=CC=CC=C1	*-H	[Br-].CC(CO-*)(COC(-*)=O)C(=O)OCCCCCC[N+]1=CC=CC=C1	1	NIL	N/A	NIL	N/A	MIC(μg/mL)	P. aeruginosa	125	(Gram −)
80	HexBr(Pyr)	N/A	N/A	*-OCC1=CC=CC=C1	*-H	[Br-].CC(CO-*)(COC(-*)=O)C(=O)OCCCCCC[N+]1=CC=CC=C1	1	NIL	N/A	NIL	N/A	MIC(μg/mL)	C. albicans	125	(fungus)
81	HexBr(DMAP)	N/A	N/A	*-OCC1=CC=CC=C1	*-H	[Br-].CN(C)C1=CC=[N+](CCCCCCOC(=O)C(C)(CO-*)COC(-*)=O)C=C1	1	NIL	N/A	NIL	N/A	MIC(μg/mL)	S. aureus	4	(Gram +)
81	HexBr(DMAP)	N/A	N/A	*-OCC1=CC=CC=C1	*-H	[Br-].CN(C)C1=CC=[N+](CCCCCCOC(=O)C(C)(CO-*)COC(-*)=O)C=C1	1	NIL	N/A	NIL	N/A	MIC(μg/mL)	E. coli	31	(Gram −)
81	HexBr(DMAP)	N/A	N/A	*-OCC1=CC=CC=C1	*-H	[Br-].CN(C)C1=CC=[N+](CCCCCCOC(=O)C(C)(CO-*)COC(-*)=O)C=C1	1	NIL	N/A	NIL	N/A	MIC(μg/mL)	P. aeruginosa	31	(Gram −)
81	HexBr(DMAP)	N/A	N/A	*-OCC1=CC=CC=C1	*-H	[Br-].CN(C)C1=CC=[N+](CCCCCCOC(=O)C(C)(CO-*)COC(-*)=O)C=C1	1	NIL	N/A	NIL	N/A	MIC(μg/mL)	C. albicans	250	(fungus)
82	HexCl(TMA)*	N/A	N/A	*-OCC1=CC=CC=C1	*-H	[Br-].CC(CO-*)(COC(-*)=O)C(=O)OCCCCCC[N+](C)(C)C	1	NIL	N/A	NIL	N/A	MIC(μg/mL)	S. aureus	125	(Gram +)
82	HexCl(TMA)*	N/A	N/A	*-OCC1=CC=CC=C1	*-H	[Br-].CC(CO-*)(COC(-*)=O)C(=O)OCCCCCC[N+](C)(C)C	1	NIL	N/A	NIL	N/A	MIC(μg/mL)	E. coli	125	(Gram −)
82	HexCl(TMA)*	N/A	N/A	*-OCC1=CC=CC=C1	*-H	[Br-].CC(CO-*)(COC(-*)=O)C(=O)OCCCCCC[N+](C)(C)C	1	NIL	N/A	NIL	N/A	MIC(μg/mL)	P. aeruginosa	1000	(Gram −)
82	HexCl(TMA)*	N/A	N/A	*-OCC1=CC=CC=C1	*-H	[Br-].CC(CO-*)(COC(-*)=O)C(=O)OCCCCCC[N+](C)(C)C	1	NIL	N/A	NIL	N/A	MIC(μg/mL)	C. albicans	250	(fungus)
83	polyurethanes copolymer	N/A	N/A	[H]N(C1CCC(CC2CCC(CC2)N([H])C(=O)OCCCCOC(=O)N([H])C2CCC(CC3CCC(CC3)N([H])C(-*)=O)CC2)CC1)C(O)=O	[H]N(C1CCC(CC2CCC(CC2)N([H])C(=O)OCCCCOC(=O)N([H])C2CCC(CC3CCC(CC3)N([H])C(-*)=O)CC2)CC1)C(O)=O	COCCOCCOCC(C)(C-*)CO-*	0.86	[Br-].CCCCCC[N+](C)(C)CCCCOCC(C)(C-*)CO-*	0.14	NIL	N/A	% of bacterial killed	E. coli	61.1	(P[(ME2Ox)(C6)]0.86:0.14-PU) (Gram -)
83	polyurethanes copolymer	N/A	N/A	[H]N(C1CCC(CC2CCC(CC2)N([H])C(=O)OCCCCOC(=O)N([H])C2CCC(CC3CCC(CC3)N([H])C(-*)=O)CC2)CC1)C(O)=O	[H]N(C1CCC(CC2CCC(CC2)N([H])C(=O)OCCCCOC(=O)N([H])C2CCC(CC3CCC(CC3)N([H])C(-*)=O)CC2)CC1)C(O)=O	COCCOCCOCC(C)(C-*)CO-*	0.86	[Br-].CCCCCC[N+](C)(C)CCCCOCC(C)(C-*)CO-*	0.14	NIL	N/A	% of bacterial killed	P. aeruginosa	59	(P[(ME2Ox)(C6)]0.86:0.14-PU) (Gram -)
83	polyurethanes copolymer	N/A	N/A	[H]N(C1CCC(CC2CCC(CC2)N([H])C(=O)OCCCCOC(=O)N([H])C2CCC(CC3CCC(CC3)N([H])C(-*)=O)CC2)CC1)C(O)=O	[H]N(C1CCC(CC2CCC(CC2)N([H])C(=O)OCCCCOC(=O)N([H])C2CCC(CC3CCC(CC3)N([H])C(-*)=O)CC2)CC1)C(O)=O	COCCOCCOCC(C)(C-*)CO-*	0.86	[Br-].CCCCCC[N+](C)(C)CCCCOCC(C)(C-*)CO-*	0.14	NIL	N/A	% of bacterial killed	S. aureus	65	(P[(ME2Ox)(C6)]0.86:0.14-PU) (Gram +)
83	polyurethanes copolymer	N/A	N/A	[H]N(C1CCC(CC2CCC(CC2)N([H])C(=O)OCCCCOC(=O)N([H])C2CCC(CC3CCC(CC3)N([H])C(-*)=O)CC2)CC1)C(O)=O	[H]N(C1CCC(CC2CCC(CC2)N([H])C(=O)OCCCCOC(=O)N([H])C2CCC(CC3CCC(CC3)N([H])C(-*)=O)CC2)CC1)C(O)=O	COCCOCCOCC(C)(C-*)CO-*	0.86	[Br-].CCCCCC[N+](C)(C)CCCCOCC(C)(C-*)CO-*	0.14	NIL	N/A	Log reduction	E. coli	0.41	(P[(ME2Ox)(C6)]0.86:0.14-PU) (Gram -)
83	polyurethanes copolymer	N/A	N/A	[H]N(C1CCC(CC2CCC(CC2)N([H])C(=O)OCCCCOC(=O)N([H])C2CCC(CC3CCC(CC3)N([H])C(-*)=O)CC2)CC1)C(O)=O	[H]N(C1CCC(CC2CCC(CC2)N([H])C(=O)OCCCCOC(=O)N([H])C2CCC(CC3CCC(CC3)N([H])C(-*)=O)CC2)CC1)C(O)=O	COCCOCCOCC(C)(C-*)CO-*	0.86	[Br-].CCCCCC[N+](C)(C)CCCCOCC(C)(C-*)CO-*	0.14	NIL	N/A	Log reduction	P. aeruginosa	0.39	(P[(ME2Ox)(C6)]0.86:0.14-PU) (Gram -)
83	polyurethanes copolymer	N/A	N/A	[H]N(C1CCC(CC2CCC(CC2)N([H])C(=O)OCCCCOC(=O)N([H])C2CCC(CC3CCC(CC3)N([H])C(-*)=O)CC2)CC1)C(O)=O	[H]N(C1CCC(CC2CCC(CC2)N([H])C(=O)OCCCCOC(=O)N([H])C2CCC(CC3CCC(CC3)N([H])C(-*)=O)CC2)CC1)C(O)=O	COCCOCCOCC(C)(C-*)CO-*	0.86	[Br-].CCCCCC[N+](C)(C)CCCCOCC(C)(C-*)CO-*	0.14	NIL	N/A	Log reduction	S. aureus	0.46	(P[(ME2Ox)(C6)]0.86:0.14-PU) (Gram +)
84	polyurethanes copolymer	N/A	N/A	[H]N(C1CCC(CC2CCC(CC2)N([H])C(=O)OCCCCOC(=O)N([H])C2CCC(CC3CCC(CC3)N([H])C(-*)=O)CC2)CC1)C(O)=O	[H]N(C1CCC(CC2CCC(CC2)N([H])C(=O)OCCCCOC(=O)N([H])C2CCC(CC3CCC(CC3)N([H])C(-*)=O)CC2)CC1)C(O)=O	COCCOCCOCC(C)(C-*)CO-*	0.86	[Br-].CCCCCCCCCCCC[N+](C)(C)CCCCOCC(C)(C-*)CO-*	0.14	NIL	N/A	% of bacterial killed	E. coli	100	(P[(ME2Ox)(C12)]0.86:0.14-PU) (Gram -)
84	polyurethanes copolymer	N/A	N/A	[H]N(C1CCC(CC2CCC(CC2)N([H])C(=O)OCCCCOC(=O)N([H])C2CCC(CC3CCC(CC3)N([H])C(-*)=O)CC2)CC1)C(O)=O	[H]N(C1CCC(CC2CCC(CC2)N([H])C(=O)OCCCCOC(=O)N([H])C2CCC(CC3CCC(CC3)N([H])C(-*)=O)CC2)CC1)C(O)=O	COCCOCCOCC(C)(C-*)CO-*	0.86	[Br-].CCCCCCCCCCCC[N+](C)(C)CCCCOCC(C)(C-*)CO-*	0.14	NIL	N/A	% of bacterial killed	P. aeruginosa	100	(P[(ME2Ox)(C12)]0.86:0.14-PU) (Gram -)
84	polyurethanes copolymer	N/A	N/A	[H]N(C1CCC(CC2CCC(CC2)N([H])C(=O)OCCCCOC(=O)N([H])C2CCC(CC3CCC(CC3)N([H])C(-*)=O)CC2)CC1)C(O)=O	[H]N(C1CCC(CC2CCC(CC2)N([H])C(=O)OCCCCOC(=O)N([H])C2CCC(CC3CCC(CC3)N([H])C(-*)=O)CC2)CC1)C(O)=O	COCCOCCOCC(C)(C-*)CO-*	0.86	[Br-].CCCCCCCCCCCC[N+](C)(C)CCCCOCC(C)(C-*)CO-*	0.14	NIL	N/A	% of bacterial killed	S. aureus	98.7	(P[(ME2Ox)(C12)]0.86:0.14-PU) (Gram +)
84	polyurethanes copolymer	N/A	N/A	[H]N(C1CCC(CC2CCC(CC2)N([H])C(=O)OCCCCOC(=O)N([H])C2CCC(CC3CCC(CC3)N([H])C(-*)=O)CC2)CC1)C(O)=O	[H]N(C1CCC(CC2CCC(CC2)N([H])C(=O)OCCCCOC(=O)N([H])C2CCC(CC3CCC(CC3)N([H])C(-*)=O)CC2)CC1)C(O)=O	COCCOCCOCC(C)(C-*)CO-*	0.86	[Br-].CCCCCCCCCCCC[N+](C)(C)CCCCOCC(C)(C-*)CO-*	0.14	NIL	N/A	Log reduction	E. coli	4.3	(P[(ME2Ox)(C12)]0.86:0.14-PU) (Gram -)
84	polyurethanes copolymer	N/A	N/A	[H]N(C1CCC(CC2CCC(CC2)N([H])C(=O)OCCCCOC(=O)N([H])C2CCC(CC3CCC(CC3)N([H])C(-*)=O)CC2)CC1)C(O)=O	[H]N(C1CCC(CC2CCC(CC2)N([H])C(=O)OCCCCOC(=O)N([H])C2CCC(CC3CCC(CC3)N([H])C(-*)=O)CC2)CC1)C(O)=O	COCCOCCOCC(C)(C-*)CO-*	0.86	[Br-].CCCCCCCCCCCC[N+](C)(C)CCCCOCC(C)(C-*)CO-*	0.14	NIL	N/A	Log reduction	P. aeruginosa	4.28	(P[(ME2Ox)(C12)]0.86:0.14-PU) (Gram -)
84	polyurethanes copolymer	N/A	N/A	[H]N(C1CCC(CC2CCC(CC2)N([H])C(=O)OCCCCOC(=O)N([H])C2CCC(CC3CCC(CC3)N([H])C(-*)=O)CC2)CC1)C(O)=O	[H]N(C1CCC(CC2CCC(CC2)N([H])C(=O)OCCCCOC(=O)N([H])C2CCC(CC3CCC(CC3)N([H])C(-*)=O)CC2)CC1)C(O)=O	COCCOCCOCC(C)(C-*)CO-*	0.86	[Br-].CCCCCCCCCCCC[N+](C)(C)CCCCOCC(C)(C-*)CO-*	0.14	NIL	N/A	Log reduction	S. aureus	1.9	(P[(ME2Ox)(C12)]0.86:0.14-PU) (Gram +)
85	polyurethanes copolymer	N/A	N/A	[H]N(C1CCC(CC2CCC(CC2)N([H])C(=O)OCCCCOC(=O)N([H])C2CCC(CC3CCC(CC3)N([H])C(-*)=O)CC2)CC1)C(O)=O	[H]N(C1CCC(CC2CCC(CC2)N([H])C(=O)OCCCCOC(=O)N([H])C2CCC(CC3CCC(CC3)N([H])C(-*)=O)CC2)CC1)C(O)=O	CC(C-*)(CO-*)COCC(F)(F)F	0.89	[Br-].CCCCCC[N+](C)(C)CCCCOCC(C)(C-*)CO-*	0.11	NIL	N/A	% of bacterial killed	E. coli	97.7	(P[(3FOx)(C6)]0.89:0.11-PU) (Gram -)
85	polyurethanes copolymer	N/A	N/A	[H]N(C1CCC(CC2CCC(CC2)N([H])C(=O)OCCCCOC(=O)N([H])C2CCC(CC3CCC(CC3)N([H])C(-*)=O)CC2)CC1)C(O)=O	[H]N(C1CCC(CC2CCC(CC2)N([H])C(=O)OCCCCOC(=O)N([H])C2CCC(CC3CCC(CC3)N([H])C(-*)=O)CC2)CC1)C(O)=O	CC(C-*)(CO-*)COCC(F)(F)F	0.89	[Br-].CCCCCC[N+](C)(C)CCCCOCC(C)(C-*)CO-*	0.11	NIL	N/A	% of bacterial killed	P. aeruginosa	98.5	(P[(3FOx)(C6)]0.89:0.11-PU) (Gram -)
85	polyurethanes copolymer	N/A	N/A	[H]N(C1CCC(CC2CCC(CC2)N([H])C(=O)OCCCCOC(=O)N([H])C2CCC(CC3CCC(CC3)N([H])C(-*)=O)CC2)CC1)C(O)=O	[H]N(C1CCC(CC2CCC(CC2)N([H])C(=O)OCCCCOC(=O)N([H])C2CCC(CC3CCC(CC3)N([H])C(-*)=O)CC2)CC1)C(O)=O	CC(C-*)(CO-*)COCC(F)(F)F	0.89	[Br-].CCCCCC[N+](C)(C)CCCCOCC(C)(C-*)CO-*	0.11	NIL	N/A	% of bacterial killed	S. aureus	98.7	(P[(3FOx)(C6)]0.89:0.11-PU) (Gram +)
85	polyurethanes copolymer	N/A	N/A	[H]N(C1CCC(CC2CCC(CC2)N([H])C(=O)OCCCCOC(=O)N([H])C2CCC(CC3CCC(CC3)N([H])C(-*)=O)CC2)CC1)C(O)=O	[H]N(C1CCC(CC2CCC(CC2)N([H])C(=O)OCCCCOC(=O)N([H])C2CCC(CC3CCC(CC3)N([H])C(-*)=O)CC2)CC1)C(O)=O	CC(C-*)(CO-*)COCC(F)(F)F	0.89	[Br-].CCCCCC[N+](C)(C)CCCCOCC(C)(C-*)CO-*	0.11	NIL	N/A	Log reduction	E. coli	1.65	(P[(3FOx)(C6)]0.89:0.11-PU) (Gram -)
85	polyurethanes copolymer	N/A	N/A	[H]N(C1CCC(CC2CCC(CC2)N([H])C(=O)OCCCCOC(=O)N([H])C2CCC(CC3CCC(CC3)N([H])C(-*)=O)CC2)CC1)C(O)=O	[H]N(C1CCC(CC2CCC(CC2)N([H])C(=O)OCCCCOC(=O)N([H])C2CCC(CC3CCC(CC3)N([H])C(-*)=O)CC2)CC1)C(O)=O	CC(C-*)(CO-*)COCC(F)(F)F	0.89	[Br-].CCCCCC[N+](C)(C)CCCCOCC(C)(C-*)CO-*	0.11	NIL	N/A	Log reduction	P. aeruginosa	1.83	(P[(3FOx)(C6)]0.89:0.11-PU) (Gram -)
85	polyurethanes copolymer	N/A	N/A	[H]N(C1CCC(CC2CCC(CC2)N([H])C(=O)OCCCCOC(=O)N([H])C2CCC(CC3CCC(CC3)N([H])C(-*)=O)CC2)CC1)C(O)=O	[H]N(C1CCC(CC2CCC(CC2)N([H])C(=O)OCCCCOC(=O)N([H])C2CCC(CC3CCC(CC3)N([H])C(-*)=O)CC2)CC1)C(O)=O	CC(C-*)(CO-*)COCC(F)(F)F	0.89	[Br-].CCCCCC[N+](C)(C)CCCCOCC(C)(C-*)CO-*	0.11	NIL	N/A	Log reduction	S. aureus	1.88	(P[(3FOx)(C6)]0.89:0.11-PU) (Gram +)
86	polyurethanes copolymer	N/A	N/A	[H]N(C1CCC(CC2CCC(CC2)N([H])C(=O)OCCCCOC(=O)N([H])C2CCC(CC3CCC(CC3)N([H])C(-*)=O)CC2)CC1)C(O)=O	[H]N(C1CCC(CC2CCC(CC2)N([H])C(=O)OCCCCOC(=O)N([H])C2CCC(CC3CCC(CC3)N([H])C(-*)=O)CC2)CC1)C(O)=O		0.89	[Br-].CCCCCCCCCCCC[N+](C)(C)CCCCOCC(C)(C-*)CO-*	0.11	NIL	N/A	% of bacterial killed	E. coli	100	(P[(3FOx)(C12)]0.89:0.11-PU) (Gram -)
86	polyurethanes copolymer	N/A	N/A	[H]N(C1CCC(CC2CCC(CC2)N([H])C(=O)OCCCCOC(=O)N([H])C2CCC(CC3CCC(CC3)N([H])C(-*)=O)CC2)CC1)C(O)=O	[H]N(C1CCC(CC2CCC(CC2)N([H])C(=O)OCCCCOC(=O)N([H])C2CCC(CC3CCC(CC3)N([H])C(-*)=O)CC2)CC1)C(O)=O		0.89	[Br-].CCCCCCCCCCCC[N+](C)(C)CCCCOCC(C)(C-*)CO-*	0.11	NIL	N/A	% of bacterial killed	P. aeruginosa	100	(P[(3FOx)(C12)]0.89:0.11-PU) (Gram -)
86	polyurethanes copolymer	N/A	N/A	[H]N(C1CCC(CC2CCC(CC2)N([H])C(=O)OCCCCOC(=O)N([H])C2CCC(CC3CCC(CC3)N([H])C(-*)=O)CC2)CC1)C(O)=O	[H]N(C1CCC(CC2CCC(CC2)N([H])C(=O)OCCCCOC(=O)N([H])C2CCC(CC3CCC(CC3)N([H])C(-*)=O)CC2)CC1)C(O)=O		0.89	[Br-].CCCCCCCCCCCC[N+](C)(C)CCCCOCC(C)(C-*)CO-*	0.11	NIL	N/A	% of bacterial killed	S. aureus	100	(P[(3FOx)(C12)]0.89:0.11-PU) (Gram +)
86	polyurethanes copolymer	N/A	N/A	[H]N(C1CCC(CC2CCC(CC2)N([H])C(=O)OCCCCOC(=O)N([H])C2CCC(CC3CCC(CC3)N([H])C(-*)=O)CC2)CC1)C(O)=O	[H]N(C1CCC(CC2CCC(CC2)N([H])C(=O)OCCCCOC(=O)N([H])C2CCC(CC3CCC(CC3)N([H])C(-*)=O)CC2)CC1)C(O)=O		0.89	[Br-].CCCCCCCCCCCC[N+](C)(C)CCCCOCC(C)(C-*)CO-*	0.11	NIL	N/A	Log reduction	E. coli	4.38	(P[(3FOx)(C12)]0.89:0.11-PU) (Gram -)
86	polyurethanes copolymer	N/A	N/A	[H]N(C1CCC(CC2CCC(CC2)N([H])C(=O)OCCCCOC(=O)N([H])C2CCC(CC3CCC(CC3)N([H])C(-*)=O)CC2)CC1)C(O)=O	[H]N(C1CCC(CC2CCC(CC2)N([H])C(=O)OCCCCOC(=O)N([H])C2CCC(CC3CCC(CC3)N([H])C(-*)=O)CC2)CC1)C(O)=O		0.89	[Br-].CCCCCCCCCCCC[N+](C)(C)CCCCOCC(C)(C-*)CO-*	0.11	NIL	N/A	Log reduction	P. aeruginosa	4.33	(P[(3FOx)(C12)]0.89:0.11-PU) (Gram -)
86	polyurethanes copolymer	N/A	N/A	[H]N(C1CCC(CC2CCC(CC2)N([H])C(=O)OCCCCOC(=O)N([H])C2CCC(CC3CCC(CC3)N([H])C(-*)=O)CC2)CC1)C(O)=O	[H]N(C1CCC(CC2CCC(CC2)N([H])C(=O)OCCCCOC(=O)N([H])C2CCC(CC3CCC(CC3)N([H])C(-*)=O)CC2)CC1)C(O)=O		0.89	[Br-].CCCCCCCCCCCC[N+](C)(C)CCCCOCC(C)(C-*)CO-*	0.11	NIL	N/A	Log reduction	S. aureus	3.57	(P[(3FOx)(C12)]0.89:0.11-PU) (Gram +)
87	PBMA72-b-PMTA50-QM	24.9	N/A	[*]C	[*]C	CCCCOC(=O)C(C)(-*)C-*	0.590164	[I-].[I-].CC1=C(CCN2C=C(COC(=O)C(C)(-*)C-*)[N+](C)=N2)SC=[N+]1C	0.41	NIL	N/A	MIC(μg/mL)	S. aureus	62	(Gram +)
87	PBMA72-b-PMTA50-QM	24.9	N/A	[*]C	[*]C	CCCCOC(=O)C(C)(-*)C-*	0.590164	[I-].[I-].CC1=C(CCN2C=C(COC(=O)C(C)(-*)C-*)[N+](C)=N2)SC=[N+]1C	0.41	NIL	N/A	MIC(μg/mL)	S. epidermidis	32	(Gram +)
87	PBMA72-b-PMTA50-QM	24.9	N/A	[*]C	[*]C	CCCCOC(=O)C(C)(-*)C-*	0.590164	[I-].[I-].CC1=C(CCN2C=C(COC(=O)C(C)(-*)C-*)[N+](C)=N2)SC=[N+]1C	0.41	NIL	N/A	MIC(μg/mL)	P. aeruginosa	>=500	(Gram -)
87	PBMA72-b-PMTA50-QM	24.9	N/A	[*]C	[*]C	CCCCOC(=O)C(C)(-*)C-*	0.590164	[I-].[I-].CC1=C(CCN2C=C(COC(=O)C(C)(-*)C-*)[N+](C)=N2)SC=[N+]1C	0.41	NIL	N/A	MIC(μg/mL)	C. parapsilosis	125
88	PBMA72-b-PMTA165-QM	58.5	N/A	[*]C	[*]C	CCCCOC(=O)C(C)(-*)C-*	0.303797	[I-].[I-].CC1=C(CCN2C=C(COC(=O)C(C)(-*)C-*)[N+](C)=N2)SC=[N+]1C	0.7	NIL	N/A	MIC(μg/mL)	S. aureus	16	(Gram +)
88	PBMA72-b-PMTA165-QM	58.5	N/A	[*]C	[*]C	CCCCOC(=O)C(C)(-*)C-*	0.303797	[I-].[I-].CC1=C(CCN2C=C(COC(=O)C(C)(-*)C-*)[N+](C)=N2)SC=[N+]1C	0.7	NIL	N/A	MIC(μg/mL)	S. epidermidis	8	(Gram +)
88	PBMA72-b-PMTA165-QM	58.5	N/A	[*]C	[*]C	CCCCOC(=O)C(C)(-*)C-*	0.303797	[I-].[I-].CC1=C(CCN2C=C(COC(=O)C(C)(-*)C-*)[N+](C)=N2)SC=[N+]1C	0.7	NIL	N/A	MIC(μg/mL)	P. aeruginosa	>=500	(Gram -)
88	PBMA72-b-PMTA165-QM	58.5	N/A	[*]C	[*]C	CCCCOC(=O)C(C)(-*)C-*	0.303797	[I-].[I-].CC1=C(CCN2C=C(COC(=O)C(C)(-*)C-*)[N+](C)=N2)SC=[N+]1C	0.7	NIL	N/A	MIC(μg/mL)	C. parapsilosis	62
89	PBMA72-b-PMTA224-QM	75.7	N/A	[*]C	[*]C	CCCCOC(=O)C(C)(-*)C-*	0.243243	[I-].[I-].CC1=C(CCN2C=C(COC(=O)C(C)(-*)C-*)[N+](C)=N2)SC=[N+]1C	0.76	NIL	N/A	MIC(μg/mL)	S. aureus	62	(Gram +)
89	PBMA72-b-PMTA224-QM	75.7	N/A	[*]C	[*]C	CCCCOC(=O)C(C)(-*)C-*	0.243243	[I-].[I-].CC1=C(CCN2C=C(COC(=O)C(C)(-*)C-*)[N+](C)=N2)SC=[N+]1C	0.76	NIL	N/A	MIC(μg/mL)	S. epidermidis	62	(Gram +)
89	PBMA72-b-PMTA224-QM	75.7	N/A	[*]C	[*]C	CCCCOC(=O)C(C)(-*)C-*	0.243243	[I-].[I-].CC1=C(CCN2C=C(COC(=O)C(C)(-*)C-*)[N+](C)=N2)SC=[N+]1C	0.76	NIL	N/A	MIC(μg/mL)	P. aeruginosa	>=500	(Gram -)
89	PBMA72-b-PMTA224-QM	75.7	N/A	[*]C	[*]C	CCCCOC(=O)C(C)(-*)C-*	0.243243	[I-].[I-].CC1=C(CCN2C=C(COC(=O)C(C)(-*)C-*)[N+](C)=N2)SC=[N+]1C	0.76	NIL	N/A	MIC(μg/mL)	C. parapsilosis	32
90	PBMA72-b-PMTA50-QB	24.9	N/A	[*]C	[*]C	CCCCOC(=O)C(C)(-*)C-*	0.590164	[I-].[I-].CCCC[N+]1=CSC(CCN2C=C(COC(=O)C(C)(-*)C-*)[N+](CCCC)=N2)=C1C	0.41	NIL	N/A	MIC(μg/mL)	S. aureus	125	(Gram +)
90	PBMA72-b-PMTA50-QB	24.9	N/A	[*]C	[*]C	CCCCOC(=O)C(C)(-*)C-*	0.590164	[I-].[I-].CCCC[N+]1=CSC(CCN2C=C(COC(=O)C(C)(-*)C-*)[N+](CCCC)=N2)=C1C	0.41	NIL	N/A	MIC(μg/mL)	S. epidermidis	62	(Gram +)
90	PBMA72-b-PMTA50-QB	24.9	N/A	[*]C	[*]C	CCCCOC(=O)C(C)(-*)C-*	0.590164	[I-].[I-].CCCC[N+]1=CSC(CCN2C=C(COC(=O)C(C)(-*)C-*)[N+](CCCC)=N2)=C1C	0.41	NIL	N/A	MIC(μg/mL)	P. aeruginosa	>=125	(Gram -)
90	PBMA72-b-PMTA50-QB	24.9	N/A	[*]C	[*]C	CCCCOC(=O)C(C)(-*)C-*	0.590164	[I-].[I-].CCCC[N+]1=CSC(CCN2C=C(COC(=O)C(C)(-*)C-*)[N+](CCCC)=N2)=C1C	0.41	NIL	N/A	MIC(μg/mL)	C. parapsilosis	>=125
91	PBMA72-b-PMTA165-QB	58.5	N/A	[*]C	[*]C	CCCCOC(=O)C(C)(-*)C-*	0.303797	[I-].[I-].CCCC[N+]1=CSC(CCN2C=C(COC(=O)C(C)(-*)C-*)[N+](CCCC)=N2)=C1C	0.7	NIL	N/A	MIC(μg/mL)	S. aureus	62	(Gram +)
91	PBMA72-b-PMTA165-QB	58.5	N/A	[*]C	[*]C	CCCCOC(=O)C(C)(-*)C-*	0.303797	[I-].[I-].CCCC[N+]1=CSC(CCN2C=C(COC(=O)C(C)(-*)C-*)[N+](CCCC)=N2)=C1C	0.7	NIL	N/A	MIC(μg/mL)	S. epidermidis	>=125	(Gram +)
91	PBMA72-b-PMTA165-QB	58.5	N/A	[*]C	[*]C	CCCCOC(=O)C(C)(-*)C-*	0.303797	[I-].[I-].CCCC[N+]1=CSC(CCN2C=C(COC(=O)C(C)(-*)C-*)[N+](CCCC)=N2)=C1C	0.7	NIL	N/A	Log reduction	S. epidermidis	0.34	(Gram +)
91	PBMA72-b-PMTA165-QB	58.5	N/A	[*]C	[*]C	CCCCOC(=O)C(C)(-*)C-*	0.303797	[I-].[I-].CCCC[N+]1=CSC(CCN2C=C(COC(=O)C(C)(-*)C-*)[N+](CCCC)=N2)=C1C	0.7	NIL	N/A	Log reduction	P. aeruginosa	0.13	(Gram +)
92	PBMA72-b-PMTA224-QB	75.7	N/A	[*]C	[*]C	CCCCOC(=O)C(C)(-*)C-*	0.243243	[I-].[I-].CCCC[N+]1=CSC(CCN2C=C(COC(=O)C(C)(-*)C-*)[N+](CCCC)=N2)=C1C	0.76	NIL	N/A	MIC(μg/mL)	S. aureus	62	(Gram +)
92	PBMA72-b-PMTA224-QB	75.7	N/A	[*]C	[*]C	CCCCOC(=O)C(C)(-*)C-*	0.243243	[I-].[I-].CCCC[N+]1=CSC(CCN2C=C(COC(=O)C(C)(-*)C-*)[N+](CCCC)=N2)=C1C	0.76	NIL	N/A	MIC(μg/mL)	S. epidermidis	62	(Gram +)
92	PBMA72-b-PMTA224-QB	75.7	N/A	[*]C	[*]C	CCCCOC(=O)C(C)(-*)C-*	0.243243	[I-].[I-].CCCC[N+]1=CSC(CCN2C=C(COC(=O)C(C)(-*)C-*)[N+](CCCC)=N2)=C1C	0.76	NIL	N/A	MIC(μg/mL)	P. aeruginosa	>=125	(Gram -)
92	PBMA72-b-PMTA224-QB	75.7	N/A	[*]C	[*]C	CCCCOC(=O)C(C)(-*)C-*	0.243243	[I-].[I-].CCCC[N+]1=CSC(CCN2C=C(COC(=O)C(C)(-*)C-*)[N+](CCCC)=N2)=C1C	0.76	NIL	N/A	MIC(μg/mL)	C. parapsilosis	>=125
93	polyA1	3	N/A	[*]=CC1=CC=CC=C1	[*]=C	[*]=CC([C@H](C(N1CCC[NH3+])=O)[C@H](C1=O)C/2C=[*])C2=C\C(C)C.[O-]OCC(F)(F)F	1.00	NIL	N/A	NIL	N/A	MIC(μg/mL)	E. coli	25
93	polyA1	3	N/A	[*]=CC1=CC=CC=C1	[*]=C	[*]=CC([C@H](C(N1CCC[NH3+])=O)[C@H](C1=O)C/2C=[*])C2=C\C(C)C.[O-]OCC(F)(F)F	1.00	NIL	N/A	NIL	N/A	MIC(μg/mL)	S. aureus	50
94	polyA2	3	N/A	[*]=CC1=CC=CC=C1	[*]=C	[*]=CC([C@H](C(N1CCC(C[NH3+])C[NH3+])=O)[C@H](C1=O)C/2C=[*])C2=C\C(C)C.[O-]OCC(F)(F)F.[O-]OCC(F)(F)F	1.00	NIL	N/A	NIL	N/A	MIC(μg/mL)	E. coli	6
94	polyA2	3	N/A	[*]=CC1=CC=CC=C1	[*]=C	[*]=CC([C@H](C(N1CCC(C[NH3+])C[NH3+])=O)[C@H](C1=O)C/2C=[*])C2=C\C(C)C.[O-]OCC(F)(F)F.[O-]OCC(F)(F)F	1.00	NIL	N/A	NIL	N/A	MIC(μg/mL)	S. aureus	50
95	polyA3	3	N/A	[*]=CC1=CC=CC=C1	[*]=C	[*]=CC([C@H](C(N1CCCC(C[NH3+])(C[NH3+])C[NH3+])=O)[C@H](C1=O)C/2C=[*])C2=C\C(C)C.[O-]OCC(F)(F)F.[O-]OCC(F)(F)F.[O-]OCC(F)(F)F	1.00	NIL	N/A	NIL	N/A	MIC(μg/mL)	E. coli	25
95	polyA3	3	N/A	[*]=CC1=CC=CC=C1	[*]=C	[*]=CC([C@H](C(N1CCCC(C[NH3+])(C[NH3+])C[NH3+])=O)[C@H](C1=O)C/2C=[*])C2=C\C(C)C.[O-]OCC(F)(F)F.[O-]OCC(F)(F)F.[O-]OCC(F)(F)F	1.00	NIL	N/A	NIL	N/A	MIC(μg/mL)	S. aureus	25
96	polyB1	3	N/A	[*]=CC1=CC=CC=C1	[*]=C	O=C([C@H]1C(C=[*])OC(C=[*])[C@H]12)N(CCC[NH3+])C2=O.[O-]OCC(F)(F)F	1.00	NIL	N/A	NIL	N/A	MIC(μg/mL)	E. coli	>400
96	polyB1	3	N/A	[*]=CC1=CC=CC=C1	[*]=C	O=C([C@H]1C(C=[*])OC(C=[*])[C@H]12)N(CCC[NH3+])C2=O.[O-]OCC(F)(F)F	1.00	NIL	N/A	NIL	N/A	MIC(μg/mL)	S. aureus	>200
97	polyB2	3	N/A	[*]=CC1=CC=CC=C1	[*]=C	[*]=CC1OC(C=[*])[C@@H](C2=O)[C@H]1C(N2CCC(C[NH3+])C[NH3+])=O.[O-]OCC(F)(F)F.[O-]OCC(F)(F)F	1.00	NIL	N/A	NIL	N/A	MIC(μg/mL)	E. coli	200
97	polyB2	3	N/A	[*]=CC1=CC=CC=C1	[*]=C	[*]=CC1OC(C=[*])[C@@H](C2=O)[C@H]1C(N2CCC(C[NH3+])C[NH3+])=O.[O-]OCC(F)(F)F.[O-]OCC(F)(F)F	1.00	NIL	N/A	NIL	N/A	MIC(μg/mL)	S. aureus	25
98	polyB3	3	N/A	[*]=CC1=CC=CC=C1	[*]=C	[*]=CC1OC(C=[*])[C@@H](C2=O)[C@H]1C(N2CCCC(C[NH3+])(C[NH3+])C[NH3+])=O.[O-]OCC(F)(F)F.[O-]OCC(F)(F)F.[O-]OCC(F)(F)F	1.00	NIL	N/A	NIL	N/A	MIC(μg/mL)	E. coli	200
98	polyB3	3	N/A	[*]=CC1=CC=CC=C1	[*]=C	[*]=CC1OC(C=[*])[C@@H](C2=O)[C@H]1C(N2CCCC(C[NH3+])(C[NH3+])C[NH3+])=O.[O-]OCC(F)(F)F.[O-]OCC(F)(F)F.[O-]OCC(F)(F)F	1.00	NIL	N/A	NIL	N/A	MIC(μg/mL)	S. aureus	1200
99	A2	31.6	N/A	[*]C	[*]C	[*]C(C(C=C1)=CC=[N+]1CC)C[*].[I-]	0.50	CC(C[*])([*])C(OC)=O	0.50	NIL	N/A	MIC(μg/mL)	E. coli	600	(Gram +)
99	A2	31.6	N/A	[*]C	[*]C	[*]C(C(C=C1)=CC=[N+]1CC)C[*].[I-]	0.50	CC(C[*])([*])C(OC)=O	0.50	NIL	N/A	MIC(μg/mL)	B. subtilis	300	(Gram -)
100	A3	33.5	N/A	[*]C	[*]C	[*]C(C1=CC=[N+](CCC)C=C1)C[*].[I-]	0.50	CC(C[*])([*])C(OC)=O	0.50	NIL	N/A	MIC(μg/mL)	E. coli	200	(Gram +)
100	A3	33.5	N/A	[*]C	[*]C	[*]C(C1=CC=[N+](CCC)C=C1)C[*].[I-]	0.50	CC(C[*])([*])C(OC)=O	0.50	NIL	N/A	MIC(μg/mL)	B. subtilis	100	(Gram -)
101	A4	35.4	N/A	[*]C	[*]C	[*]C(C1=CC=[N+](CCCC)C=C1)C[*].[I-]	0.50	CC(C[*])([*])C(OC)=O	0.50	NIL	N/A	MIC(μg/mL)	E. coli	50	(Gram +)
101	A4	35.4	N/A	[*]C	[*]C	[*]C(C1=CC=[N+](CCCC)C=C1)C[*].[I-]	0.50	CC(C[*])([*])C(OC)=O	0.50	NIL	N/A	MIC(μg/mL)	B. subtilis	30	(Gram -)
102	A6	39.1	N/A	[*]C	[*]C	[*]C(C1=CC=[N+](CCCCCC)C=C1)C[*].[I-]	0.50	CC(C[*])([*])C(OC)=O	0.50	NIL	N/A	MIC(μg/mL)	E. coli	100	(Gram +)
102	A6	39.1	N/A	[*]C	[*]C	[*]C(C1=CC=[N+](CCCCCC)C=C1)C[*].[I-]	0.50	CC(C[*])([*])C(OC)=O	0.50	NIL	N/A	MIC(μg/mL)	B. subtilis	25	(Gram -)
103	A8	42.9	N/A	[*]C	[*]C	[*]C(C1=CC=[N+](CCCCCCCC)C=C1)C[*].[I-]	0.50	CC(C[*])([*])C(OC)=O	0.50	NIL	N/A	MIC(μg/mL)	E. coli	450	(Gram +)
103	A8	42.9	N/A	[*]C	[*]C	[*]C(C1=CC=[N+](CCCCCCCC)C=C1)C[*].[I-]	0.50	CC(C[*])([*])C(OC)=O	0.50	NIL	N/A	MIC(μg/mL)	B. subtilis	150	(Gram -)
104	A10	46.6	N/A	[*]C	[*]C	[*]C(C1=CC=[N+](CCCCCCCCCC)C=C1)C[*].[I-]	0.50	CC(C[*])([*])C(OC)=O	0.50	NIL	N/A	MIC(μg/mL)	E. coli	1100	(Gram +)
104	A10	46.6	N/A	[*]C	[*]C	[*]C(C1=CC=[N+](CCCCCCCCCC)C=C1)C[*].[I-]	0.50	CC(C[*])([*])C(OC)=O	0.50	NIL	N/A	MIC(μg/mL)	B. subtilis	300	(Gram -)
105	B2	30.4	N/A	[*]C	[*]C	C[N+]1=CC=C(C(C[*])[*])C=C1.[I-]	0.50	CC(C[*])([*])C(OCC)=O	0.50	NIL	N/A	MIC(μg/mL)	E. coli	350	(Gram +)
105	B2	30.4	N/A	[*]C	[*]C	C[N+]1=CC=C(C(C[*])[*])C=C1.[I-]	0.50	CC(C[*])([*])C(OCC)=O	0.50	NIL	N/A	MIC(μg/mL)	B. subtilis	300	(Gram -)
106	B3	31.5	N/A	[*]C	[*]C	C[N+]1=CC=C(C(C[*])[*])C=C1.[I-]	0.50	CC(C[*])([*])C(OCCC)=O	0.50	NIL	N/A	MIC(μg/mL)	E. coli	100	(Gram +)
106	B3	31.5	N/A	[*]C	[*]C	C[N+]1=CC=C(C(C[*])[*])C=C1.[I-]	0.50	CC(C[*])([*])C(OCCC)=O	0.50	NIL	N/A	MIC(μg/mL)	B. subtilis	50	(Gram -)
107	B4	35.2	N/A	[*]C	[*]C	C[N+]1=CC=C(C(C[*])[*])C=C1.[I-]	0.50	CC(C[*])([*])C(OCCCC)=O	0.50	NIL	N/A	MIC(μg/mL)	E. coli	15	(Gram +)
107	B4	35.2	N/A	[*]C	[*]C	C[N+]1=CC=C(C(C[*])[*])C=C1.[I-]	0.50	CC(C[*])([*])C(OCCCC)=O	0.50	NIL	N/A	MIC(μg/mL)	B. subtilis	15	(Gram -)
108	B6	29.3	N/A	[*]C	[*]C	C[N+]1=CC=C(C(C[*])[*])C=C1.[I-]	0.50	CC(C[*])([*])C(OCCCCCC)=O	0.50	NIL	N/A	MIC(μg/mL)	E. coli	50	(Gram +)
108	B6	29.3	N/A	[*]C	[*]C	C[N+]1=CC=C(C(C[*])[*])C=C1.[I-]	0.50	CC(C[*])([*])C(OCCCCCC)=O	0.50	NIL	N/A	MIC(μg/mL)	B. subtilis	10	(Gram -)
109	B8	N/A	N/A	[*]C	[*]C	C[N+]1=CC=C(C(C[*])[*])C=C1.[I-]	0.50	CC(C[*])([*])C(OCCCCCCCC)=O	0.50	NIL	N/A	MIC(μg/mL)	E. coli	125	(Gram +)
109	B8	N/A	N/A	[*]C	[*]C	C[N+]1=CC=C(C(C[*])[*])C=C1.[I-]	0.50	CC(C[*])([*])C(OCCCCCCCC)=O	0.50	NIL	N/A	MIC(μg/mL)	B. subtilis	40	(Gram -)
110	B10	N/A	N/A	[*]C	[*]C	C[N+]1=CC=C(C(C[*])[*])C=C1.[I-]	0.50	CC(C[*])([*])C(OCCCCCCCCCC)=O	0.50	NIL	N/A	MIC(μg/mL)	E. coli	650	(Gram +)
110	B10	N/A	N/A	[*]C	[*]C	C[N+]1=CC=C(C(C[*])[*])C=C1.[I-]	0.50	CC(C[*])([*])C(OCCCCCCCCCC)=O	0.50	NIL	N/A	MIC(μg/mL)	B. subtilis	100	(Gram -)
111	C2	32.2	N/A	[*]C	[*]C	[*]C(C1=CC=[N+](CC)C=C1)C[*].[I-]	0.50	CC(C[*])([*])C(OCC)=O	0.50	NIL	N/A	MIC(μg/mL)	E. coli	350	(Gram +)
111	C2	32.2	N/A	[*]C	[*]C	[*]C(C1=CC=[N+](CC)C=C1)C[*].[I-]	0.50	CC(C[*])([*])C(OCC)=O	0.50	NIL	N/A	MIC(μg/mL)	B. subtilis	350	(Gram -)
112	C3	35	N/A	[*]C	[*]C	[*]C(C1=CC=[N+](CCC)C=C1)C[*].[I-]	0.50	CC(C[*])([*])C(OCCC)=O	0.50	NIL	N/A	MIC(μg/mL)	E. coli	175	(Gram +)
112	C3	35	N/A	[*]C	[*]C	[*]C(C1=CC=[N+](CCC)C=C1)C[*].[I-]	0.50	CC(C[*])([*])C(OCCC)=O	0.50	NIL	N/A	MIC(μg/mL)	B. subtilis	25	(Gram -)
113	C4	40.8	N/A	[*]C	[*]C	[*]C(C1=CC=[N+](CCCC)C=C1)C[*].[I-]	0.50	CC(C[*])([*])C(OCCCC)=O	0.50	NIL	N/A	MIC(μg/mL)	E. coli	175	(Gram +)
113	C4	40.8	N/A	[*]C	[*]C	[*]C(C1=CC=[N+](CCCC)C=C1)C[*].[I-]	0.50	CC(C[*])([*])C(OCCCC)=O	0.50	NIL	N/A	MIC(μg/mL)	B. subtilis	25	(Gram -)
114	C6	37.6	N/A	[*]C	[*]C	[*]C(C1=CC=[N+](CCCCCC)C=C1)C[*].[I-]	0.50	CC(C[*])([*])C(OCCCCCC)=O	0.50	NIL	N/A	MIC(μg/mL)	E. coli	300	(Gram +)
114	C6	37.6	N/A	[*]C	[*]C	[*]C(C1=CC=[N+](CCCCCC)C=C1)C[*].[I-]	0.50	CC(C[*])([*])C(OCCCCCC)=O	0.50	NIL	N/A	MIC(μg/mL)	B. subtilis	100	(Gram -)
115	P1.0	27.7	N/A	[*]C	[*]C	[*]C(C[*])C1=CC=[N+](CCCC)C=C1.[I-]	0.53	[*]C(C[*])C1=CC=[N+](C)C=C1.[I-]	0.00	CC(C(OC)=O)([*])C[*]	0.47	MIC(μg/mL)	E. coli	50	(Gram +)
115	P1.0	27.7	N/A	[*]C	[*]C	[*]C(C[*])C1=CC=[N+](CCCC)C=C1.[I-]	0.53	[*]C(C[*])C1=CC=[N+](C)C=C1.[I-]	0.00	CC(C(OC)=O)([*])C[*]	0.47	MIC(μg/mL)	B. subtilis	30	(Gram -)
116	P2.3	38.9	N/A	[*]C	[*]C	[*]C(C[*])C1=CC=[N+](CCCC)C=C1.[I-]	0.30	[*]C(C[*])C1=CC=[N+](C)C=C1.[I-]	0.40	CC(C(OC)=O)([*])C[*]	0.3	MIC(μg/mL)	E. coli	300	(Gram +)
116	P2.3	38.9	N/A	[*]C	[*]C	[*]C(C[*])C1=CC=[N+](CCCC)C=C1.[I-]	0.30	[*]C(C[*])C1=CC=[N+](C)C=C1.[I-]	0.40	CC(C(OC)=O)([*])C[*]	0.3	MIC(μg/mL)	B. subtilis	150	(Gram -)
117	P3.1	43.8	N/A	[*]C	[*]C	[*]C(C[*])C1=CC=[N+](CCCC)C=C1.[I-]	0.25	[*]C(C[*])C1=CC=[N+](C)C=C1.[I-]	0.53	CC(C(OC)=O)([*])C[*]	0.225	MIC(μg/mL)	E. coli	400	(Gram +)
117	P3.1	43.8	N/A	[*]C	[*]C	[*]C(C[*])C1=CC=[N+](CCCC)C=C1.[I-]	0.25	[*]C(C[*])C1=CC=[N+](C)C=C1.[I-]	0.53	CC(C(OC)=O)([*])C[*]	0.225	MIC(μg/mL)	B. subtilis	250	(Gram -)
118	P4.1	N/A	N/A	[*]C	[*]C	[*]C(C[*])C1=CC=[N+](CCCC)C=C1.[I-]	0.20	[*]C(C[*])C1=CC=[N+](C)C=C1.[I-]	0.61	CC(C(OC)=O)([*])C[*]	0.2	MIC(μg/mL)	E. coli	900	(Gram +)
118	P4.1	N/A	N/A	[*]C	[*]C	[*]C(C[*])C1=CC=[N+](CCCC)C=C1.[I-]	0.20	[*]C(C[*])C1=CC=[N+](C)C=C1.[I-]	0.61	CC(C(OC)=O)([*])C[*]	0.2	MIC(μg/mL)	B. subtilis	600	(Gram -)
119	Q0.5	39	N/A	[*]C	[*]C	[*]C(C1=CC=[N+](C)C=C1)C[*].[I-]	0.33	CC(C[*])([*])C(OCCCC)=O	0.67	NIL	N/A	MIC(μg/mL)	E. coli	200	(Gram +)
119	Q0.5	39	N/A	[*]C	[*]C	[*]C(C1=CC=[N+](C)C=C1)C[*].[I-]	0.33	CC(C[*])([*])C(OCCCC)=O	0.67	NIL	N/A	MIC(μg/mL)	B. subtilis	50	(Gram -)
120	Q1.1	33.2	N/A	[*]C	[*]C	[*]C(C1=CC=[N+](C)C=C1)C[*].[I-]	0.52	CC(C[*])([*])C(OCCCC)=O	0.48	NIL	N/A	MIC(μg/mL)	E. coli	15	(Gram +)
120	Q1.1	33.2	N/A	[*]C	[*]C	[*]C(C1=CC=[N+](C)C=C1)C[*].[I-]	0.52	CC(C[*])([*])C(OCCCC)=O	0.48	NIL	N/A	MIC(μg/mL)	B. subtilis	15	(Gram -)
121	Q2.2	45.5	N/A	[*]C	[*]C	[*]C(C1=CC=[N+](C)C=C1)C[*].[I-]	0.69	CC(C[*])([*])C(OCCCC)=O	0.31	NIL	N/A	MIC(μg/mL)	E. coli	200	(Gram +)
121	Q2.2	45.5	N/A	[*]C	[*]C	[*]C(C1=CC=[N+](C)C=C1)C[*].[I-]	0.69	CC(C[*])([*])C(OCCCC)=O	0.31	NIL	N/A	MIC(μg/mL)	B. subtilis	100	(Gram -)
122	Q3.4	55.9	N/A	[*]C	[*]C	[*]C(C1=CC=[N+](C)C=C1)C[*].[I-]	0.77	CC(C[*])([*])C(OCCCC)=O	0.23	NIL	N/A	MIC(μg/mL)	E. coli	400	(Gram +)
122	Q3.4	55.9	N/A	[*]C	[*]C	[*]C(C1=CC=[N+](C)C=C1)C[*].[I-]	0.77	CC(C[*])([*])C(OCCCC)=O	0.23	NIL	N/A	MIC(μg/mL)	B. subtilis	250	(Gram -)
123	Q4.3	N/A	N/A	[*]C	[*]C	[*]C(C1=CC=[N+](C)C=C1)C[*].[I-]	0.81	CC(C[*])([*])C(OCCCC)=O	0.19	NIL	N/A	MIC(μg/mL)	E. coli	800	(Gram +)
123	Q4.3	N/A	N/A	[*]C	[*]C	[*]C(C1=CC=[N+](C)C=C1)C[*].[I-]	0.81	CC(C[*])([*])C(OCCCC)=O	0.19	NIL	N/A	MIC(μg/mL)	B. subtilis	500	(Gram -)
124	Poly(1)	3.3	N/A	*-H	[*]C	CN(C)CC1=CC=C(C([*])C[*])C=C1	1	NIL	N/A	NIL	N/A	MIC(μg/mL)	E. coli	25	(JM1090)
124	Poly(1)	3.3	N/A	*-H	[*]C	CN(C)CC1=CC=C(C([*])C[*])C=C2	1	NIL	N/A	NIL	N/A	MIC(μg/mL)	B. subtilis	12.5	(BR151)
124	Poly(1)	3.3	N/A	*-H	[*]C	CN(C)CC1=CC=C(C([*])C[*])C=C3	1	NIL	N/A	NIL	N/A	MIC(μg/mL)	S. aureus	50	(5332)
124	Poly(1)	3.3	N/A	*-H	[*]C	CN(C)CC1=CC=C(C([*])C[*])C=C4	1	NIL	N/A	NIL	N/A	MIC(μg/mL)	E. faecium	12.5	(A436)
125	Poly(3)	3	N/A	*-H	[*]C	C[N+](C)(C)CC1=CC=C(C(C[*])[*])C=C1.[Cl-]	1	NIL	N/A	NIL	N/A	MIC(μg/mL)	E. coli	>50	(JM1090)
125	Poly(3)	3	N/A	*-H	[*]C	C[N+](C)(C)CC1=CC=C(C(C[*])[*])C=C1.[Cl-]	1	NIL	N/A	NIL	N/A	MIC(μg/mL)	B. subtilis	50	(BR151)
125	Poly(3)	3	N/A	*-H	[*]C	C[N+](C)(C)CC1=CC=C(C(C[*])[*])C=C1.[Cl-]	1	NIL	N/A	NIL	N/A	MIC(μg/mL)	S. aureus	>50	(5332)
125	Poly(3)	3	N/A	*-H	[*]C	C[N+](C)(C)CC1=CC=C(C(C[*])[*])C=C1.[Cl-]	1	NIL	N/A	NIL	N/A	MIC(μg/mL)	E. faecium	>50	(A436)
126	polyamides	0.7	N/A	*-H	N[*]	O=C([*])C1=CC=CC(C(NC2=CC(C(C)(C)C)=CC(N[*])=C2SCC[NH3+])=O)=C1	1.00	NIL	N/A	NIL	N/A	MIC(μg/mL)	E. coli	19
126	polyamides	0.7	N/A	*-H	N[*]	O=C([*])C1=CC=CC(C(NC2=CC(C(C)(C)C)=CC(N[*])=C2SCC[NH3+])=O)=C1	1.00	NIL	N/A	NIL	N/A	MIC(μg/mL)	K. pneumoniae	66
126	polyamides	0.7	N/A	*-H	N[*]	O=C([*])C1=CC=CC(C(NC2=CC(C(C)(C)C)=CC(N[*])=C2SCC[NH3+])=O)=C1	1.00	NIL	N/A	NIL	N/A	MIC(μg/mL)	B. subtilis	12
127	polyamides	1.1	N/A	*-H	N[*]	O=C([*])C1=CC=CC(C(NC2=CC(C(C)(C)C)=CC(N[*])=C2SCC[NH3+])=O)=C1	1.00	NIL	N/A	NIL	N/A	MIC(μg/mL)	E. coli	19
127	polyamides	1.1	N/A	*-H	N[*]	O=C([*])C1=CC=CC(C(NC2=CC(C(C)(C)C)=CC(N[*])=C2SCC[NH3+])=O)=C1	1.00	NIL	N/A	NIL	N/A	MIC(μg/mL)	B. subtilis	19
128	polyamides	1.1	N/A	*-H	N[*]	O=C([*])C1=CC=CC(C(NC2=CC(C(C)(C)C)=CC(N[*])=C2SCC[NH3+])=O)=C1	1.00	NIL	N/A	NIL	N/A	MIC(μg/mL)	E. coli	11.5
128	polyamides	2.9	N/A	*-H	N[*]	O=C([*])C1=CC=CC(C(NC2=CC(C(C)(C)C)=CC(N[*])=C2SCC[NH3+])=O)=C1	1.00	NIL	N/A	NIL	N/A	MIC(μg/mL)	K. pneumoniae	40.5
128	polyamides	2.9	N/A	*-H	N[*]	O=C([*])C1=CC=CC(C(NC2=CC(C(C)(C)C)=CC(N[*])=C2SCC[NH3+])=O)=C1	1.00	NIL	N/A	NIL	N/A	MIC(μg/mL)	B. subtilis	16
129	polyamides	21.5	N/A	*-H	N[*]	O=C([*])C1=CC=CC(C(NC2=CC(C(C)(C)C)=CC(N[*])=C2SCC[NH3+])=O)=C1	1.00	NIL	N/A	NIL	N/A	MIC(μg/mL)	E. coli	>200
130	polyamides	4.3	N/A	*-H	N[*]	O=C([*])C1=CC=CC(C(NC2=CC(C(C)(C)C)=CC(N[*])=C2SCCNC(C)=O)=O)=C1	1.00	NIL	N/A	NIL	N/A	MIC(μg/mL)	E. coli	>500
130	polyamides	4.3	N/A	*-H	N[*]	O=C([*])C1=CC=CC(C(NC2=CC(C(C)(C)C)=CC(N[*])=C2SCCNC(C)=O)=O)=C1	1.00	NIL	N/A	NIL	N/A	MIC(μg/mL)	K. pneumoniae	250
130	polyamides	4.3	N/A	*-H	N[*]	O=C([*])C1=CC=CC(C(NC2=CC(C(C)(C)C)=CC(N[*])=C2SCCNC(C)=O)=O)=C1	1.00	NIL	N/A	NIL	N/A	MIC(μg/mL)	B. subtilis	>500
131	poly-1	2.1	N/A	[*]=CC1=CC=CC=C1	[*]=C	FC(F)(F)CO[O-].[NH3+]CCN(C([C@H]1[C@@H]2[C@H](C=[*])O[C@@H]1C=[*])=O)C2=O	1.00	NIL	N/A	NIL	N/A	MIC(μg/mL)	E. coli	400
131	poly-1	2.1	N/A	[*]=CC1=CC=CC=C1	[*]=C	FC(F)(F)CO[O-].[NH3+]CCN(C([C@H]1[C@@H]2[C@H](C=[*])O[C@@H]1C=[*])=O)C2=O	1.00	NIL	N/A	NIL	N/A	MIC(μg/mL)	S. marcescens	400
131	poly-1	2.1	N/A	[*]=CC1=CC=CC=C1	[*]=C	FC(F)(F)CO[O-].[NH3+]CCN(C([C@H]1[C@@H]2[C@H](C=[*])O[C@@H]1C=[*])=O)C2=O	1.00	NIL	N/A	NIL	N/A	MIC(μg/mL)	S. aureus	400
131	poly-1	2.1	N/A	[*]=CC1=CC=CC=C1	[*]=C	FC(F)(F)CO[O-].[NH3+]CCN(C([C@H]1[C@@H]2[C@H](C=[*])O[C@@H]1C=[*])=O)C2=O	1.00	NIL	N/A	NIL	N/A	MIC(μg/mL)	B. subtilis	200
132	poly-3	2.1	N/A	[*]=CC1=CC=CC=C1	[*]=C	FC(F)(F)CO[O-].[NH3+]CCN(C([C@H]1[C@@H]2[C@H](C=[*])/C([C@@H]1C=[*])=C\C(C)C)=O)C2=O	1.00	NIL	N/A	NIL	N/A	MIC(μg/mL)	E. coli	25
132	poly-3	2.1	N/A	[*]=CC1=CC=CC=C1	[*]=C	FC(F)(F)CO[O-].[NH3+]CCN(C([C@H]1[C@@H]2[C@H](C=[*])/C([C@@H]1C=[*])=C\C(C)C)=O)C2=O	1.00	NIL	N/A	NIL	N/A	MIC(μg/mL)	S. marcescens	25
132	poly-3	2.1	N/A	[*]=CC1=CC=CC=C1	[*]=C	FC(F)(F)CO[O-].[NH3+]CCN(C([C@H]1[C@@H]2[C@H](C=[*])/C([C@@H]1C=[*])=C\C(C)C)=O)C2=O	1.00	NIL	N/A	NIL	N/A	MIC(μg/mL)	S. aureus	25
132	poly-3	2.1	N/A	[*]=CC1=CC=CC=C1	[*]=C	FC(F)(F)CO[O-].[NH3+]CCN(C([C@H]1[C@@H]2[C@H](C=[*])/C([C@@H]1C=[*])=C\C(C)C)=O)C2=O	1.00	NIL	N/A	NIL	N/A	MIC(μg/mL)	B. subtilis	12
133	PGON	1.8	N/A	[*]=CC1=CC=CC=C1	[*]=C	[O-]OCC(F)(F)F.NC(N)=[NH+]CCN1C(=O)[C@H]2[C@H](C-*)O[C@H](C-*)[C@H]2C1=O	1.00	NIL	N/A	NIL	N/A	MIC(μg/mL)	E. coli	6
133	PGON	1.8	N/A	[*]=CC1=CC=CC=C1	[*]=C	[O-]OCC(F)(F)F.NC(N)=[NH+]CCN1C(=O)[C@H]2[C@H](C-*)O[C@H](C-*)[C@H]2C1=O	1.00	NIL	N/A	NIL	N/A	MIC(μg/mL)	S. marcescens	50
133	PGON	1.8	N/A	[*]=CC1=CC=CC=C1	[*]=C	[O-]OCC(F)(F)F.NC(N)=[NH+]CCN1C(=O)[C@H]2[C@H](C-*)O[C@H](C-*)[C@H]2C1=O	1.00	NIL	N/A	NIL	N/A	MIC(μg/mL)	S. aureus	12
133	PGON	1.8	N/A	[*]=CC1=CC=CC=C1	[*]=C	[O-]OCC(F)(F)F.NC(N)=[NH+]CCN1C(=O)[C@H]2[C@H](C-*)O[C@H](C-*)[C@H]2C1=O	1.00	NIL	N/A	NIL	N/A	MIC(μg/mL)	B. subtilis	12
134	Methy_3k	11.2	N/A	[*]=CC1=CC=CC=C1	[*]=C	O=C(OCC[NH3+])C1C(C=[*])OC(C=[*])C1C(OC)=O	1.00	NIL	N/A	NIL	N/A	MIC90(μg/mL)	E. coli	>200
134	Methy_3k	11.2	N/A	[*]=CC1=CC=CC=C1	[*]=C	O=C(OCC[NH3+])C1C(C=[*])OC(C=[*])C1C(OC)=O	1.00	NIL	N/A	NIL	N/A	MIC90(μg/mL)	S. aureus	100
135	Ethyl_3k	9.2	N/A	[*]=CC1=CC=CC=C1	[*]=C	[*]=CC1OC(C=[*])C(C(OCC)=O)C1C(OCC[NH3+])=O	1.00	NIL	N/A	NIL	N/A	MIC90(μg/mL)	E. coli	50
135	Ethyl_3k	9.2	N/A	[*]=CC1=CC=CC=C1	[*]=C	[*]=CC1OC(C=[*])C(C(OCC)=O)C1C(OCC[NH3+])=O	1.00	NIL	N/A	NIL	N/A	MIC90(μg/mL)	S. aureus	50
136	Propyl_3k	9.2	N/A	[*]=CC1=CC=CC=C1	[*]=C	[*]=CC1OC(C=[*])C(C(OCCC)=O)C1C(OCC[NH3+])=O	1.00	NIL	N/A	NIL	N/A	MIC90(μg/mL)	E. coli	6.25
136	Propyl_3k	9.2	N/A	[*]=CC1=CC=CC=C1	[*]=C	[*]=CC1OC(C=[*])C(C(OCCC)=O)C1C(OCC[NH3+])=O	1.00	NIL	N/A	NIL	N/A	MIC90(μg/mL)	S. aureus	15
137	Butyl_3k	11.5	N/A	[*]=CC1=CC=CC=C1	[*]=C	[*]=CC1OC(C=[*])C(C(OCCCC)=O)C1C(OCC[NH3+])=O	1.00	NIL	N/A	NIL	N/A	MIC90(μg/mL)	E. coli	15
137	Butyl_3k	11.5	N/A	[*]=CC1=CC=CC=C1	[*]=C	[*]=CC1OC(C=[*])C(C(OCCCC)=O)C1C(OCC[NH3+])=O	1.00	NIL	N/A	NIL	N/A	MIC90(μg/mL)	S. aureus	25
138	Isopentyl_3k	11.4	N/A	[*]=CC1=CC=CC=C1	[*]=C	[*]=CC1OC(C=[*])C(C(OCCC(C)C)=O)C1C(OCC[NH3+])=O	1.00	NIL	N/A	NIL	N/A	MIC90(μg/mL)	E. coli	12.5
138	Isopentyl_3k	11.4	N/A	[*]=CC1=CC=CC=C1	[*]=C	[*]=CC1OC(C=[*])C(C(OCCC(C)C)=O)C1C(OCC[NH3+])=O	1.00	NIL	N/A	NIL	N/A	MIC90(μg/mL)	S. aureus	50
139	Hexyl_3k	11	N/A	[*]=CC1=CC=CC=C1	[*]=C	[*]=CC1OC(C=[*])C(C(OCCCCCC)=O)C1C(OCC[NH3+])=O	1.00	NIL	N/A	NIL	N/A	MIC90(μg/mL)	E. coli	>200
139	Hexyl_3k	11	N/A	[*]=CC1=CC=CC=C1	[*]=C	[*]=CC1OC(C=[*])C(C(OCCCCCC)=O)C1C(OCC[NH3+])=O	1.00	NIL	N/A	NIL	N/A	MIC90(μg/mL)	S. aureus	>200
140	Methy_10k	49	N/A	[*]=CC1=CC=CC=C1	[*]=C	O=C(OCC[NH3+])C1C(C=[*])OC(C=[*])C1C(OC)=O	1.00	NIL	N/A	NIL	N/A	MIC90(μg/mL)	E. coli	>200
140	Methy_10k	49	N/A	[*]=CC1=CC=CC=C1	[*]=C	O=C(OCC[NH3+])C1C(C=[*])OC(C=[*])C1C(OC)=O	1.00	NIL	N/A	NIL	N/A	MIC90(μg/mL)	S. aureus	>200
141	Ethyl_10k	11.3	N/A	[*]=CC1=CC=CC=C1	[*]=C	[*]=CC1OC(C=[*])C(C(OCC)=O)C1C(OCC[NH3+])=O	1.00	NIL	N/A	NIL	N/A	MIC90(μg/mL)	E. coli	>200
141	Ethyl_10k	11.3	N/A	[*]=CC1=CC=CC=C1	[*]=C	[*]=CC1OC(C=[*])C(C(OCC)=O)C1C(OCC[NH3+])=O	1.00	NIL	N/A	NIL	N/A	MIC90(μg/mL)	S. aureus	>200
142	Propyl_10k	28.2	N/A	[*]=CC1=CC=CC=C1	[*]=C	[*]=CC1OC(C=[*])C(C(OCCC)=O)C1C(OCC[NH3+])=O	1.00	NIL	N/A	NIL	N/A	MIC90(μg/mL)	E. coli	3.75
142	Propyl_10k	28.2	N/A	[*]=CC1=CC=CC=C1	[*]=C	[*]=CC1OC(C=[*])C(C(OCCC)=O)C1C(OCC[NH3+])=O	1.00	NIL	N/A	NIL	N/A	MIC90(μg/mL)	S. aureus	200
143	Butyl_10k	26.7	N/A	[*]=CC1=CC=CC=C1	[*]=C	[*]=CC1OC(C=[*])C(C(OCCCC)=O)C1C(OCC[NH3+])=O	1.00	NIL	N/A	NIL	N/A	MIC90(μg/mL)	E. coli	20
143	Butyl_10k	26.7	N/A	[*]=CC1=CC=CC=C1	[*]=C	[*]=CC1OC(C=[*])C(C(OCCCC)=O)C1C(OCC[NH3+])=O	1.00	NIL	N/A	NIL	N/A	MIC90(μg/mL)	S. aureus	>200
144	Isopentyl_8k	22.6	N/A	[*]=CC1=CC=CC=C1	[*]=C	[*]=CC1OC(C=[*])C(C(OCCC(C)C)=O)C1C(OCC[NH3+])=O	1.00	NIL	N/A	NIL	N/A	MIC90(μg/mL)	E. coli	50
144	Isopentyl_8k	22.6	N/A	[*]=CC1=CC=CC=C1	[*]=C	[*]=CC1OC(C=[*])C(C(OCCC(C)C)=O)C1C(OCC[NH3+])=O	1.00	NIL	N/A	NIL	N/A	MIC90(μg/mL)	S. aureus	>200
145	Isopentyl_10k	51.5	N/A	[*]=CC1=CC=CC=C1	[*]=C	[*]=CC1OC(C=[*])C(C(OCCC(C)C)=O)C1C(OCC[NH3+])=O	1.00	NIL	N/A	NIL	N/A	MIC90(μg/mL)	E. coli	50
145	Isopentyl_10k	51.5	N/A	[*]=CC1=CC=CC=C1	[*]=C	[*]=CC1OC(C=[*])C(C(OCCC(C)C)=O)C1C(OCC[NH3+])=O	1.00	NIL	N/A	NIL	N/A	MIC90(μg/mL)	S. aureus	200
146	Hexyl_10k	27.6	N/A	[*]=CC1=CC=CC=C1	[*]=C	[*]=CC1OC(C=[*])C(C(OCCCCCC)=O)C1C(OCC[NH3+])=O	1.00	NIL	N/A	NIL	N/A	MIC90(μg/mL)	E. coli	100
146	Hexyl_10k	27.6	N/A	[*]=CC1=CC=CC=C1	[*]=C	[*]=CC1OC(C=[*])C(C(OCCCCCC)=O)C1C(OCC[NH3+])=O	1.00	NIL	N/A	NIL	N/A	MIC90(μg/mL)	S. aureus	>200
147	branched N,N-dodecyl methyl-PEI	4461.9	Glass	[*]C	[*]C	CCC[N+](C)(CCCCCCCCCCCC)CC	0.67	C[N+](C)(CC[N+](C)(C)CCCCCCCCCCCC)CCC	0.33	NIL	N/A	% of bacterial killed	S. aureus	99
147	branched N,N-dodecyl methyl-PEI	4461.9	Glass	[*]C	[*]C	CCC[N+](C)(CCCCCCCCCCCC)CC	0.67	C[N+](C)(CC[N+](C)(C)CCCCCCCCCCCC)CCC	0.33	NIL	N/A	% of bacterial killed	E. coli	99	(Gram -)
148	branched N,N-dodecyl methyl-PEI	1168.2	Glass	[*]C	[*]C	C[N+](CC[*])(CCCCCCCCCCCC)[*]	1.00	NIL	N/A	NIL	N/A	% of bacterial killed	S. aureus	100
148	branched N,N-dodecyl methyl-PEI	1168.2	Glass	[*]C	[*]C	C[N+](CC[*])(CCCCCCCCCCCC)[*]	1.00	NIL	N/A	NIL	N/A	% of bacterial killed	E. coli	100	(Gram -)
149	branched N,N-dodecyl methyl-PEI	1499	Glass	[*]C	[*]C	[*][N+](CC[*])(CCCCCCCCCCCCCCC([O-])=O)[H]	1.00	NIL	N/A	NIL	N/A	% of bacterial killed	S. aureus	26
149	branched N,N-dodecyl methyl-PEI	1499	Glass	[*]C	[*]C	[*][N+](CC[*])(CCCCCCCCCCCCCCC([O-])=O)[H]	1.00	NIL	N/A	NIL	N/A	% of bacterial killed	E. coli	14	(Gram -)
150	branched N,N-dodecyl methyl-PEI	1286.6	Glass	[*]C	[*]C	[*]N(C(CCCCCCCCCC([O-])=O)=O)CC[*]	1.00	NIL	N/A	NIL	N/A	% of bacterial killed	S. aureus	21
150	branched N,N-dodecyl methyl-PEI	1286.6	Glass	[*]C	[*]C	[*]N(C(CCCCCCCCCC([O-])=O)=O)CC[*]	1.00	NIL	N/A	NIL	N/A	% of bacterial killed	E. coli	22	(Gram -)
151	branched N,N-dodecyl methyl-PEI	1140.6	Glass	[*]C	[*]C	O=C(CCCCCCCCCCC)N(CC[*])[*]	1.00	NIL	N/A	NIL	N/A	% of bacterial killed	S. aureus	34
151	branched N,N-dodecyl methyl-PEI	1140.6	Glass	[*]C	[*]C	O=C(CCCCCCCCCCC)N(CC[*])[*]	1.00	NIL	N/A	NIL	N/A	% of bacterial killed	E. coli	14	(Gram -)
152	Cl-EDMH (The active chlorine content in the test) suspensions was 500 ppm)	0.19063	N/A	*-CN1C(=O)N(Cl)C(C)(C)C1=O	*-C	-	1.00	NIL	N/A	NIL	N/A	Log reduction	E. coli	8	(Gram -)
152	Cl-EDMH (The active chlorine content in the test) suspensions was 500 ppm)	0.19063	N/A	*-CN1C(=O)N(Cl)C(C)(C)C1=O	*-C	-	1.00	NIL	N/A	NIL	N/A	Log reduction	S. aureus	8	(Gram +)
153	Cl-HDMH	0.24673	N/A	*-CN1C(=O)N(Cl)C(C)(C)C1=O	*-C	CCCC	1.00	NIL	N/A	NIL	N/A	Log reduction	E. coli	8	(Gram -)
153	Cl-HDMH	0.24673	N/A	*-CN1C(=O)N(Cl)C(C)(C)C1=O	*-C	CCCC	1.00	NIL	N/A	NIL	N/A	Log reduction	S. aureus	8	(Gram +)
154	Cl-DCSDMH	0.47116	N/A	*-CN1C(=O)N(Cl)C(C)(C)C1=O	*-C	CCCCCCCCCCCCCCCCCCCC	1.00	NIL	N/A	NIL	N/A	Log reduction	E. coli	8	(Gram -)
154	Cl-DCSDMH	0.47116	N/A	*-CN1C(=O)N(Cl)C(C)(C)C1=O	*-C	CCCCCCCCCCCCCCCCCCCC	1.00	NIL	N/A	NIL	N/A	Log reduction	S. aureus	8	(Gram +)
155	PC40_10K	9.7	N/A	CO-*	CO-*	[Cl-].CC(CO-*)(COC(-*)=O)C(=O)OCCC[N+](C)(C)C	0.3	CCOC(=O)C(C)(CO-*)COC(-*)=O	0.7	NIL	N/A	MIC(μg/mL)	S. aureus	0.25		Mole fractions of monomers are recorded in spreadsheet, though not necessarily the number of repeats, i.e. a polymer with 10 units of each monomer may be 0.5 mole fractions, though a polymer with 20 units of each has the same mole fraction, though is substantially larger
155	PC40_10K	9.7	N/A	CO-*	CO-*	[Cl-].CC(CO-*)(COC(-*)=O)C(=O)OCCC[N+](C)(C)C	0.3	CCOC(=O)C(C)(CO-*)COC(-*)=O	0.7	NIL	N/A	MIC(μg/mL)	E. coli	0.5
155	PC40_10K	9.7	N/A	CO-*	CO-*	[Cl-].CC(CO-*)(COC(-*)=O)C(=O)OCCC[N+](C)(C)C	0.3	CCOC(=O)C(C)(CO-*)COC(-*)=O	0.7	NIL	N/A	MIC(μg/mL)	P. aeruginosa	0.5
156	PC50_10K	11.5	N/A	CO-*	CO-*	[Cl-].CC(CO-*)(COC(-*)=O)C(=O)OCCC[N+](C)(C)C	0.39	CCOC(=O)C(C)(CO-*)COC(-*)=O	0.61	NIL	N/A	MIC(μg/mL)	S. aureus	0.125
156	PC50_10K	11.5	N/A	CO-*	CO-*	[Cl-].CC(CO-*)(COC(-*)=O)C(=O)OCCC[N+](C)(C)C	0.39	CCOC(=O)C(C)(CO-*)COC(-*)=O	0.61	NIL	N/A	MIC(μg/mL)	E. coli	0.125
156	PC50_10K	11.5	N/A	CO-*	CO-*	[Cl-].CC(CO-*)(COC(-*)=O)C(=O)OCCC[N+](C)(C)C	0.39	CCOC(=O)C(C)(CO-*)COC(-*)=O	0.61	NIL	N/A	MIC(μg/mL)	P. aeruginosa	0.25
157	PC60_10K	9.7	N/A	CO-*	CO-*	[Cl-].CC(CO-*)(COC(-*)=O)C(=O)OCCC[N+](C)(C)C	0.5	CCOC(=O)C(C)(CO-*)COC(-*)=O	0.5	NIL	N/A	MIC(μg/mL)	S. aureus	0.063
157	PC60_10K	9.7	N/A	CO-*	CO-*	[Cl-].CC(CO-*)(COC(-*)=O)C(=O)OCCC[N+](C)(C)C	0.5	CCOC(=O)C(C)(CO-*)COC(-*)=O	0.5	NIL	N/A	MIC(μg/mL)	E. coli	0.25
157	PC60_10K	9.7	N/A	CO-*	CO-*	[Cl-].CC(CO-*)(COC(-*)=O)C(=O)OCCC[N+](C)(C)C	0.5	CCOC(=O)C(C)(CO-*)COC(-*)=O	0.5	NIL	N/A	MIC(μg/mL)	P. aeruginosa	0.25
158	PC70_10K	10.3	N/A	CO-*	CO-*	[Cl-].CC(CO-*)(COC(-*)=O)C(=O)OCCC[N+](C)(C)C	0.6	CCOC(=O)C(C)(CO-*)COC(-*)=O	0.4	NIL	N/A	MIC(μg/mL)	S. aureus	0.5
158	PC70_10K	10.3	N/A	CO-*	CO-*	[Cl-].CC(CO-*)(COC(-*)=O)C(=O)OCCC[N+](C)(C)C	0.6	CCOC(=O)C(C)(CO-*)COC(-*)=O	0.4	NIL	N/A	MIC(μg/mL)	E. coli	0.5
158	PC70_10K	10.3	N/A	CO-*	CO-*	[Cl-].CC(CO-*)(COC(-*)=O)C(=O)OCCC[N+](C)(C)C	0.6	CCOC(=O)C(C)(CO-*)COC(-*)=O	0.4	NIL	N/A	MIC(μg/mL)	P. aeruginosa	>0.5
159	PC100_10K	11.4	N/A	CO-*	CO-*	[Cl-].CC(CO-*)(COC(-*)=O)C(=O)OCCC[N+](C)(C)C	1	CCOC(=O)C(C)(CO-*)COC(-*)=O	0	NIL	N/A	MIC(μg/mL)	S. aureus	>0.5
159	PC100_10K	11.4	N/A	CO-*	CO-*	[Cl-].CC(CO-*)(COC(-*)=O)C(=O)OCCC[N+](C)(C)C	1	CCOC(=O)C(C)(CO-*)COC(-*)=O	0	NIL	N/A	MIC(μg/mL)	E. coli	>0.5
159	PC100_10K	11.4	N/A	CO-*	CO-*	[Cl-].CC(CO-*)(COC(-*)=O)C(=O)OCCC[N+](C)(C)C	1	CCOC(=O)C(C)(CO-*)COC(-*)=O	0	NIL	N/A	MIC(μg/mL)	P. aeruginosa	>0.5
160	PC50_6K	6.7	N/A	CO-*	CO-*	[Cl-].CC(CO-*)(COC(-*)=O)C(=O)OCCC[N+](C)(C)C	0.4	CCOC(=O)C(C)(CO-*)COC(-*)=O	0.6	NIL	N/A	MIC(μg/mL)	S. aureus	0.063
160	PC50_6K	6.7	N/A	CO-*	CO-*	[Cl-].CC(CO-*)(COC(-*)=O)C(=O)OCCC[N+](C)(C)C	0.4	CCOC(=O)C(C)(CO-*)COC(-*)=O	0.6	NIL	N/A	MIC(μg/mL)	E. coli	0.25
160	PC50_6K	6.7	N/A	CO-*	CO-*	[Cl-].CC(CO-*)(COC(-*)=O)C(=O)OCCC[N+](C)(C)C	0.4	CCOC(=O)C(C)(CO-*)COC(-*)=O	0.6	NIL	N/A	MIC(μg/mL)	P. aeruginosa	0.25
161	PC50_16K	15.6	N/A	CO-*	CO-*	[Cl-].CC(CO-*)(COC(-*)=O)C(=O)OCCC[N+](C)(C)C	0.42	CCOC(=O)C(C)(CO-*)COC(-*)=O	0.58	NIL	N/A	MIC(μg/mL)	S. aureus	0.5
161	PC50_16K	15.6	N/A	CO-*	CO-*	[Cl-].CC(CO-*)(COC(-*)=O)C(=O)OCCC[N+](C)(C)C	0.42	CCOC(=O)C(C)(CO-*)COC(-*)=O	0.58	NIL	N/A	MIC(μg/mL)	E. coli	0.125
161	PC50_16K	15.6	N/A	CO-*	CO-*	[Cl-].CC(CO-*)(COC(-*)=O)C(=O)OCCC[N+](C)(C)C	0.42	CCOC(=O)C(C)(CO-*)COC(-*)=O	0.58	NIL	N/A	MIC(μg/mL)	P. aeruginosa	0.125
162	Block3040	15.6	N/A	CO-*	CO-*	[Cl-].CC(CO-*)(COC(=O)O-*)C(=O)OCCC[N+](C)(C)C	0.43	CCOC(=O)C(C)(CO-*)COC(-*)=O	0.57	NIL	N/A	MIC(μg/mL)	S. aureus	>0.5
162	Block3040	15.6	N/A	CO-*	CO-*	[Cl-].CC(CO-*)(COC(=O)O-*)C(=O)OCCC[N+](C)(C)C	0.43	CCOC(=O)C(C)(CO-*)COC(-*)=O	0.57	NIL	N/A	MIC(μg/mL)	E. coli	>0.5
162	Block3040	15.6	N/A	CO-*	CO-*	[Cl-].CC(CO-*)(COC(=O)O-*)C(=O)OCCC[N+](C)(C)C	0.43	CCOC(=O)C(C)(CO-*)COC(-*)=O	0.57	NIL	N/A	MIC(μg/mL)	P. aeruginosa	>0.5
163	Br3040	15.7	N/A	CO-*	CO-*	[Br-].CC(CO-*)(COC(=O)O-*)C(=O)OCCC[N+](C)(C)C	0.43	CCOC(=O)C(C)(CO-*)COC(-*)=O	0.57	NIL	N/A	MIC(μg/mL)	S. aureus	0.5
163	Br3040	15.7	N/A	CO-*	CO-*	[Br-].CC(CO-*)(COC(=O)O-*)C(=O)OCCC[N+](C)(C)C	0.43	CCOC(=O)C(C)(CO-*)COC(-*)=O	0.57	NIL	N/A	MIC(μg/mL)	E. coli	0.125
163	Br3040	15.7	N/A	CO-*	CO-*	[Br-].CC(CO-*)(COC(=O)O-*)C(=O)OCCC[N+](C)(C)C	0.43	CCOC(=O)C(C)(CO-*)COC(-*)=O	0.57	NIL	N/A	MIC(μg/mL)	P. aeruginosa	0.125
164	LA3040	16.9	N/A	CO-*	CO-*	[Cl-].CCCC[N+](C)(C)CCCOC(=O)C(C)(CO-*)COC(=O)OC-*	0.43	CCOC(=O)C(C)(CO-*)COC(-*)=O	0.57	NIL	N/A	MIC(μg/mL)	S. aureus	0.25
164	LA3040	16.9	N/A	CO-*	CO-*	[Cl-].CCCC[N+](C)(C)CCCOC(=O)C(C)(CO-*)COC(=O)OC-*	0.43	CCOC(=O)C(C)(CO-*)COC(-*)=O	0.57	NIL	N/A	MIC(μg/mL)	E. coli	0.5
164	LA3040	16.9	N/A	CO-*	CO-*	[Cl-].CCCC[N+](C)(C)CCCOC(=O)C(C)(CO-*)COC(=O)OC-*	0.43	CCOC(=O)C(C)(CO-*)COC(-*)=O	0.57	NIL	N/A	MIC(μg/mL)	P. aeruginosa	0.5
165	Gal3040	18.2	N/A	CO-*	CO-*	[Cl-].CC(CO-*)(COC(=O)OC-*)C(=O)OCCC[N+](C)(C)C	0.39	CCOC(=O)C(C)(CO-*)COC(-*)=O	0.51	CC(CO-*)(COC(=O)O-*)C(=O)OCC1OC(O)C(O)C(O)C1O	0.1	MIC(μg/mL)	S. aureus	0.25
165	Gal3040	18.2	N/A	CO-*	CO-*	[Cl-].CC(CO-*)(COC(=O)OC-*)C(=O)OCCC[N+](C)(C)C	0.39	CCOC(=O)C(C)(CO-*)COC(-*)=O	0.51	CC(CO-*)(COC(=O)O-*)C(=O)OCC1OC(O)C(O)C(O)C1O	0.1	MIC(μg/mL)	E. coli	>0.5
165	Gal3040	18.2	N/A	CO-*	CO-*	[Cl-].CC(CO-*)(COC(=O)OC-*)C(=O)OCCC[N+](C)(C)C	0.39	CCOC(=O)C(C)(CO-*)COC(-*)=O	0.51	CC(CO-*)(COC(=O)O-*)C(=O)OCC1OC(O)C(O)C(O)C1O	0.1	MIC(μg/mL)	P. aeruginosa	0.5
166	4a	3	N/A	[Br-].CC[N+]1=CC=C(CN2C(=O)C3C(OC(\C=C\C4=CC=CC=C4)C3C2=O)\C=C\*)C=C1	*-C=C	[Br-].CC[N+]1=CC=C(CN2C(=O)C3C(OC(\C=C\*)C3C2=O)\C=C\*)C=C1	1	NIL	N/A	NIL	N/A	MIC(μg/mL)	E. coli	200
166	4a	10	N/A	[Br-].CC[N+]1=CC=C(CN2C(=O)C3C(OC(\C=C\C4=CC=CC=C4)C3C2=O)\C=C\*)C=C1	*-C=C	[Br-].CC[N+]1=CC=C(CN2C(=O)C3C(OC(\C=C\*)C3C2=O)\C=C\*)C=C1	1	NIL	N/A	NIL	N/A	MIC(μg/mL)	B. subtilis	200
167	4a	3	N/A	[Br-].CC[N+]1=CC=C(CN2C(=O)C3C(OC(\C=C\C4=CC=CC=C4)C3C2=O)\C=C\*)C=C1	*-C=C	[Br-].CC[N+]1=CC=C(CN2C(=O)C3C(OC(\C=C\*)C3C2=O)\C=C\*)C=C1	1	NIL	N/A	NIL	N/A	MIC(μg/mL)	E. coli	200
167	4a	10	N/A	[Br-].CC[N+]1=CC=C(CN2C(=O)C3C(OC(\C=C\C4=CC=CC=C4)C3C2=O)\C=C\*)C=C1	*-C=C	[Br-].CC[N+]1=CC=C(CN2C(=O)C3C(OC(\C=C\*)C3C2=O)\C=C\*)C=C1	1	NIL	N/A	NIL	N/A	MIC(μg/mL)	B. subtilis	200
168	4b	3	N/A	[Br-].CC[N+]1=CC=C(CN2C(=O)C3C(OC(\C=C\C4=CC=CC=C4)C3C2=O)\C=C\*)C=C1	*-C=C	[Br-].CCCC[N+]1=CC=C(CN2C(=O)C3C(OC(\C=C\*)C3C2=O)\C=C\*)C=C1	1	NIL	N/A	NIL	N/A	MIC(μg/mL)	E. coli	200
168	4b	10	N/A	[Br-].CC[N+]1=CC=C(CN2C(=O)C3C(OC(\C=C\C4=CC=CC=C4)C3C2=O)\C=C\*)C=C1	*-C=C	[Br-].CCCC[N+]1=CC=C(CN2C(=O)C3C(OC(\C=C\*)C3C2=O)\C=C\*)C=C1	1	NIL	N/A	NIL	N/A	MIC(μg/mL)	B. subtilis	200
169	4b	3	N/A	[Br-].CC[N+]1=CC=C(CN2C(=O)C3C(OC(\C=C\C4=CC=CC=C4)C3C2=O)\C=C\*)C=C1	*-C=C	[Br-].CCCC[N+]1=CC=C(CN2C(=O)C3C(OC(\C=C\*)C3C2=O)\C=C\*)C=C1	1	NIL	N/A	NIL	N/A	MIC(μg/mL)	E. coli	200
169	4b	10	N/A	[Br-].CC[N+]1=CC=C(CN2C(=O)C3C(OC(\C=C\C4=CC=CC=C4)C3C2=O)\C=C\*)C=C1	*-C=C	[Br-].CCCC[N+]1=CC=C(CN2C(=O)C3C(OC(\C=C\*)C3C2=O)\C=C\*)C=C1	1	NIL	N/A	NIL	N/A	MIC(μg/mL)	B. subtilis	200
170	4c	3	N/A	[Br-].CC[N+]1=CC=C(CN2C(=O)C3C(OC(\C=C\C4=CC=CC=C4)C3C2=O)\C=C\*)C=C1	*-C=C	[Br-].CCCCCC[N+]1=CC=C(CN2C(=O)C3=C(C(OC3\C=C\*)\C=C\*)C2=O)C=C1	1	NIL	N/A	NIL	N/A	MIC(μg/mL)	E. coli	12.5
170	4c	10	N/A	[Br-].CC[N+]1=CC=C(CN2C(=O)C3C(OC(\C=C\C4=CC=CC=C4)C3C2=O)\C=C\*)C=C1	*-C=C	[Br-].CCCCCC[N+]1=CC=C(CN2C(=O)C3=C(C(OC3\C=C\*)\C=C\*)C2=O)C=C1	1	NIL	N/A	NIL	N/A	MIC(μg/mL)	B. subtilis	4
171	4c	3	N/A	[Br-].CC[N+]1=CC=C(CN2C(=O)C3C(OC(\C=C\C4=CC=CC=C4)C3C2=O)\C=C\*)C=C1	*-C=C	[Br-].CCCCCC[N+]1=CC=C(CN2C(=O)C3=C(C(OC3\C=C\*)\C=C\*)C2=O)C=C1	1	NIL	N/A	NIL	N/A	MIC(μg/mL)	E. coli	12.5
171	4c	10	N/A	[Br-].CC[N+]1=CC=C(CN2C(=O)C3C(OC(\C=C\C4=CC=CC=C4)C3C2=O)\C=C\*)C=C1	*-C=C	[Br-].CCCCCC[N+]1=CC=C(CN2C(=O)C3=C(C(OC3\C=C\*)\C=C\*)C2=O)C=C1	1	NIL	N/A	NIL	N/A	MIC(μg/mL)	B. subtilis	4
172	4d	3	N/A	[Br-].CC[N+]1=CC=C(CN2C(=O)C3C(OC(\C=C\C4=CC=CC=C4)C3C2=O)\C=C\*)C=C1	*-C=C	[Br-].CCCCCCCC[N+]1=CC=C(CN2C(=O)C3C(OC(\C=C\*)C3C2=O)\C=C\*)C=C1	1	NIL	N/A	NIL	N/A	MIC(μg/mL)	E. coli	4
172	4d	10	N/A	[Br-].CC[N+]1=CC=C(CN2C(=O)C3C(OC(\C=C\C4=CC=CC=C4)C3C2=O)\C=C\*)C=C1	*-C=C	[Br-].CCCCCCCC[N+]1=CC=C(CN2C(=O)C3C(OC(\C=C\*)C3C2=O)\C=C\*)C=C1	1	NIL	N/A	NIL	N/A	MIC(μg/mL)	B. subtilis	4
173	4d	3	N/A	[Br-].CC[N+]1=CC=C(CN2C(=O)C3C(OC(\C=C\C4=CC=CC=C4)C3C2=O)\C=C\*)C=C1	*-C=C	[Br-].CCCCCCCC[N+]1=CC=C(CN2C(=O)C3C(OC(\C=C\*)C3C2=O)\C=C\*)C=C1	1	NIL	N/A	NIL	N/A	MIC(μg/mL)	E. coli	6
173	4d	10	N/A	[Br-].CC[N+]1=CC=C(CN2C(=O)C3C(OC(\C=C\C4=CC=CC=C4)C3C2=O)\C=C\*)C=C1	*-C=C	[Br-].CCCCCCCC[N+]1=CC=C(CN2C(=O)C3C(OC(\C=C\*)C3C2=O)\C=C\*)C=C1	1	NIL	N/A	NIL	N/A	MIC(μg/mL)	B. subtilis	4
174	4e	3	N/A	[Br-].CC[N+]1=CC=C(CN2C(=O)C3C(OC(\C=C\C4=CC=CC=C4)C3C2=O)\C=C\*)C=C1	*-C=C	[Br-].CCCCCCCCCC[N+]1=CC=C(CN2C(=O)C3C(OC(\C=C\*)C3C2=O)\C=C\*)C=C1	1	NIL	N/A	NIL	N/A	MIC(μg/mL)	E. coli	12.5
174	4e	10	N/A	[Br-].CC[N+]1=CC=C(CN2C(=O)C3C(OC(\C=C\C4=CC=CC=C4)C3C2=O)\C=C\*)C=C1	*-C=C	[Br-].CCCCCCCCCC[N+]1=CC=C(CN2C(=O)C3C(OC(\C=C\*)C3C2=O)\C=C\*)C=C1	1	NIL	N/A	NIL	N/A	MIC(μg/mL)	B. subtilis	6
175	4e	3	N/A	[Br-].CC[N+]1=CC=C(CN2C(=O)C3C(OC(\C=C\C4=CC=CC=C4)C3C2=O)\C=C\*)C=C1	*-C=C	[Br-].CCCCCCCCCC[N+]1=CC=C(CN2C(=O)C3C(OC(\C=C\*)C3C2=O)\C=C\*)C=C1	1	NIL	N/A	NIL	N/A	MIC(μg/mL)	E. coli	12.5
175	4e	10	N/A	[Br-].CC[N+]1=CC=C(CN2C(=O)C3C(OC(\C=C\C4=CC=CC=C4)C3C2=O)\C=C\*)C=C1	*-C=C	[Br-].CCCCCCCCCC[N+]1=CC=C(CN2C(=O)C3C(OC(\C=C\*)C3C2=O)\C=C\*)C=C1	1	NIL	N/A	NIL	N/A	MIC(μg/mL)	B. subtilis	6
176	4f	3	N/A	[Br-].CC[N+]1=CC=C(CN2C(=O)C3C(OC(\C=C\C4=CC=CC=C4)C3C2=O)\C=C\*)C=C1	*-C=C	[Br-].*\C=C\C1OC(\C=C\*)C2C1C(=O)N(CC1=CC=[N+](CCC3=CC=CC=C3)C=C1)C2=O	1	NIL	N/A	NIL	N/A	MIC(μg/mL)	E. coli	12.5
176	4f	10	N/A	[Br-].CC[N+]1=CC=C(CN2C(=O)C3C(OC(\C=C\C4=CC=CC=C4)C3C2=O)\C=C\*)C=C1	*-C=C	[Br-].*\C=C\C1OC(\C=C\*)C2C1C(=O)N(CC1=CC=[N+](CCC3=CC=CC=C3)C=C1)C2=O	1	NIL	N/A	NIL	N/A	MIC(μg/mL)	B. subtilis	12.5
177	4f	3	N/A	[Br-].CC[N+]1=CC=C(CN2C(=O)C3C(OC(\C=C\C4=CC=CC=C4)C3C2=O)\C=C\*)C=C1	*-C=C	[Br-].*\C=C\C1OC(\C=C\*)C2C1C(=O)N(CC1=CC=[N+](CCC3=CC=CC=C3)C=C1)C2=O	1	NIL	N/A	NIL	N/A	MIC(μg/mL)	E. coli	12.5
177	4f	10	N/A	[Br-].CC[N+]1=CC=C(CN2C(=O)C3C(OC(\C=C\C4=CC=CC=C4)C3C2=O)\C=C\*)C=C1	*-C=C	[Br-].*\C=C\C1OC(\C=C\*)C2C1C(=O)N(CC1=CC=[N+](CCC3=CC=CC=C3)C=C1)C2=O	1	NIL	N/A	NIL	N/A	MIC(μg/mL)	B. subtilis	12.5
