# Supplementary material for: Advancing antimicrobial polymer development: a novel database and accelerated design via machine learning
Source: Royal Society of Chemistry journal article supplement (doi:10.1039/d4py00736k), 2024-01-01
Supplement: d4py00736k2.pdf [file d4py00736k2.pdf]

## **Advancing Antimicrobial Polymer Development: A Novel Database and Accelerated Design via Machine Learning**

Yuankai Zhao<sup>a</sup>, Roger J Mulder<sup>b</sup> Daniel J. Eyckens<sup>b</sup>, Shadi Houshyar<sup>a</sup> and Tu C. Le<sup>a,\*</sup>

<sup>a</sup> School of Engineering, STEM College, RMIT University, GPO Box 2476, Melbourne, VIC 3001, Australia

<sup>b</sup> CSIRO Manufacturing, Research Way, Clayton, VIC 3168, Australia

\* Tu.Le@rmit.edu.au

Section 1: Decision Tree

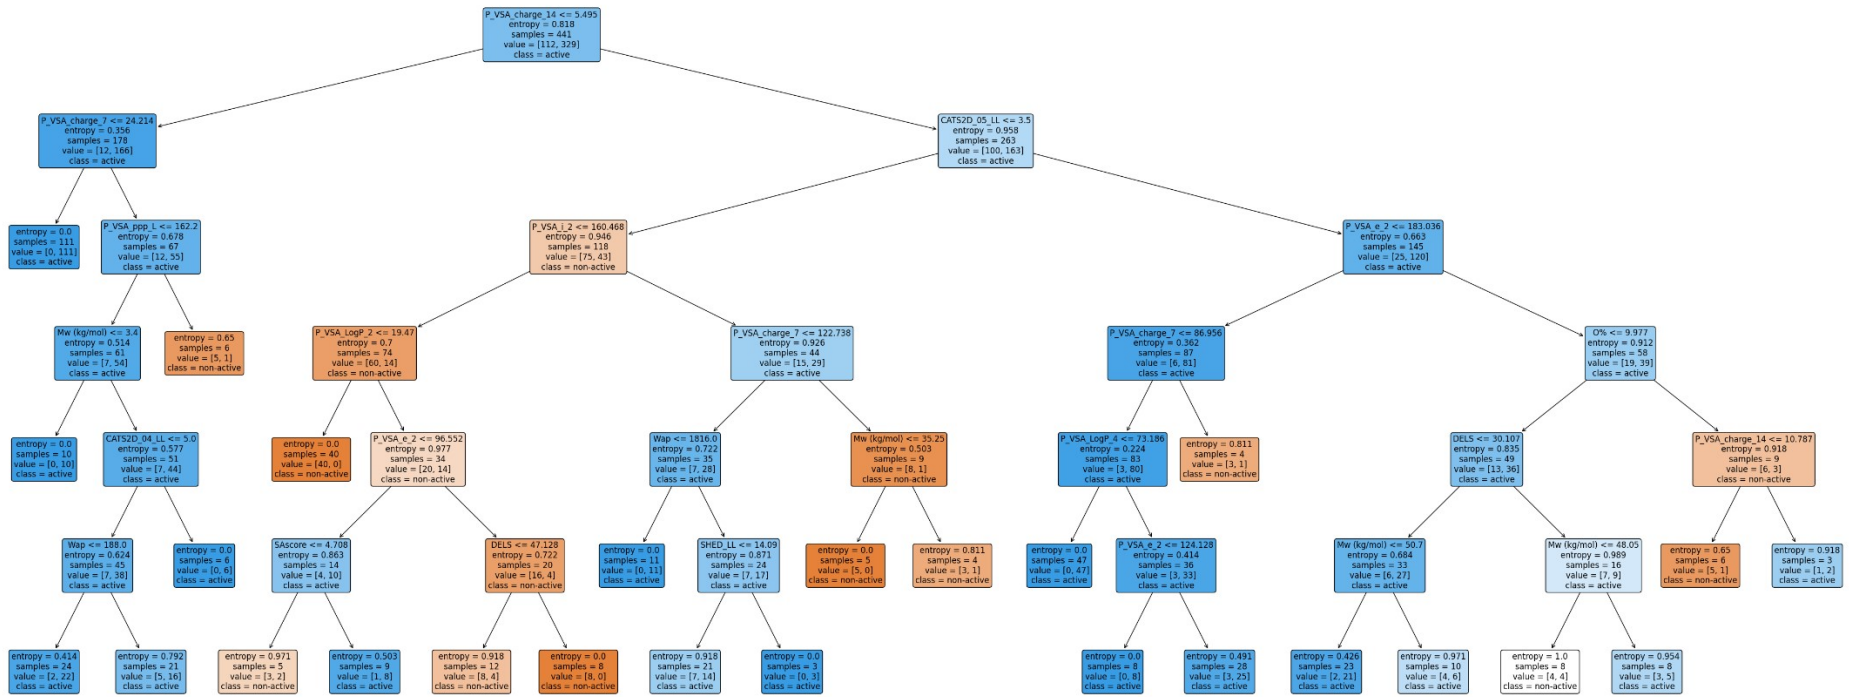

Figure S1. The Decision Tree structure shows how the model make decisions for AMPs.

Section 2: ROC curves

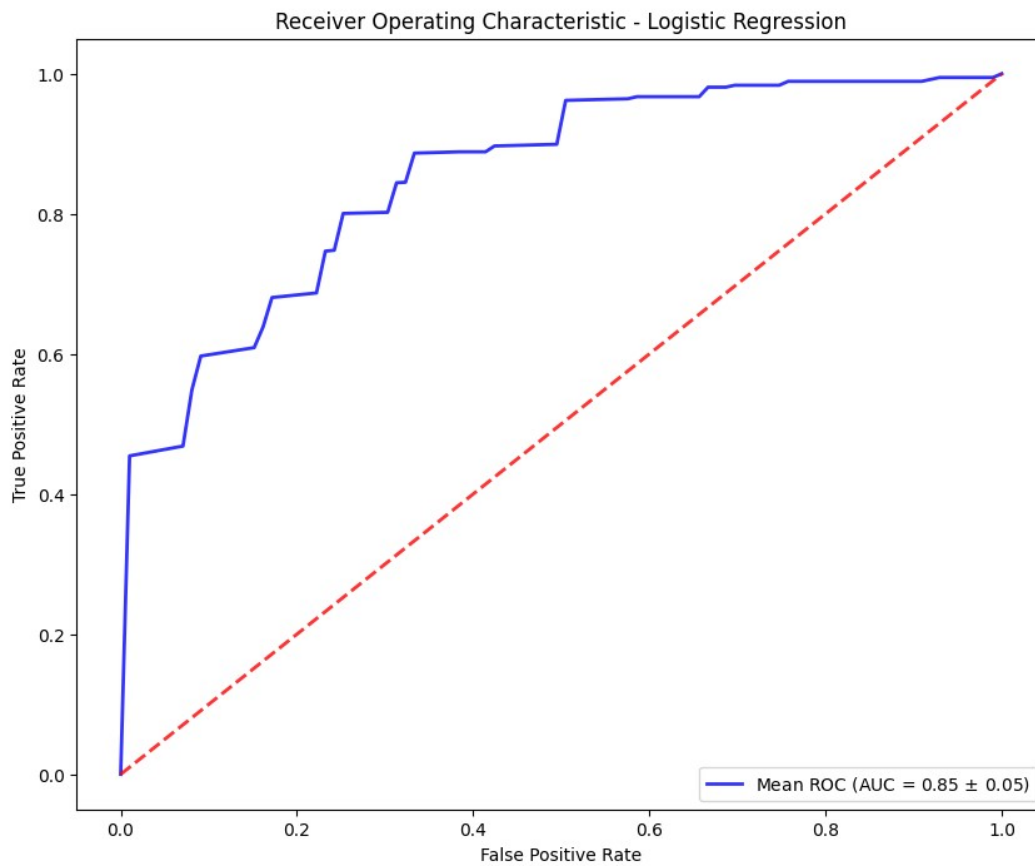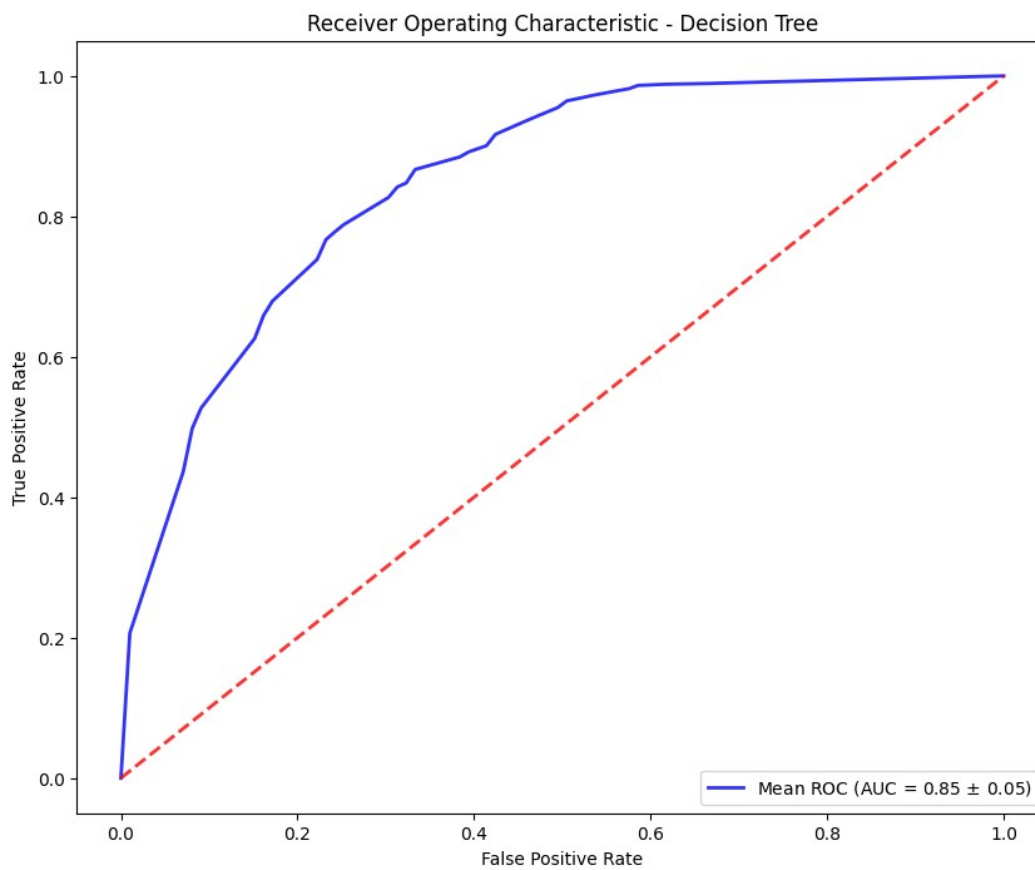

# RMIT Classification: Trusted

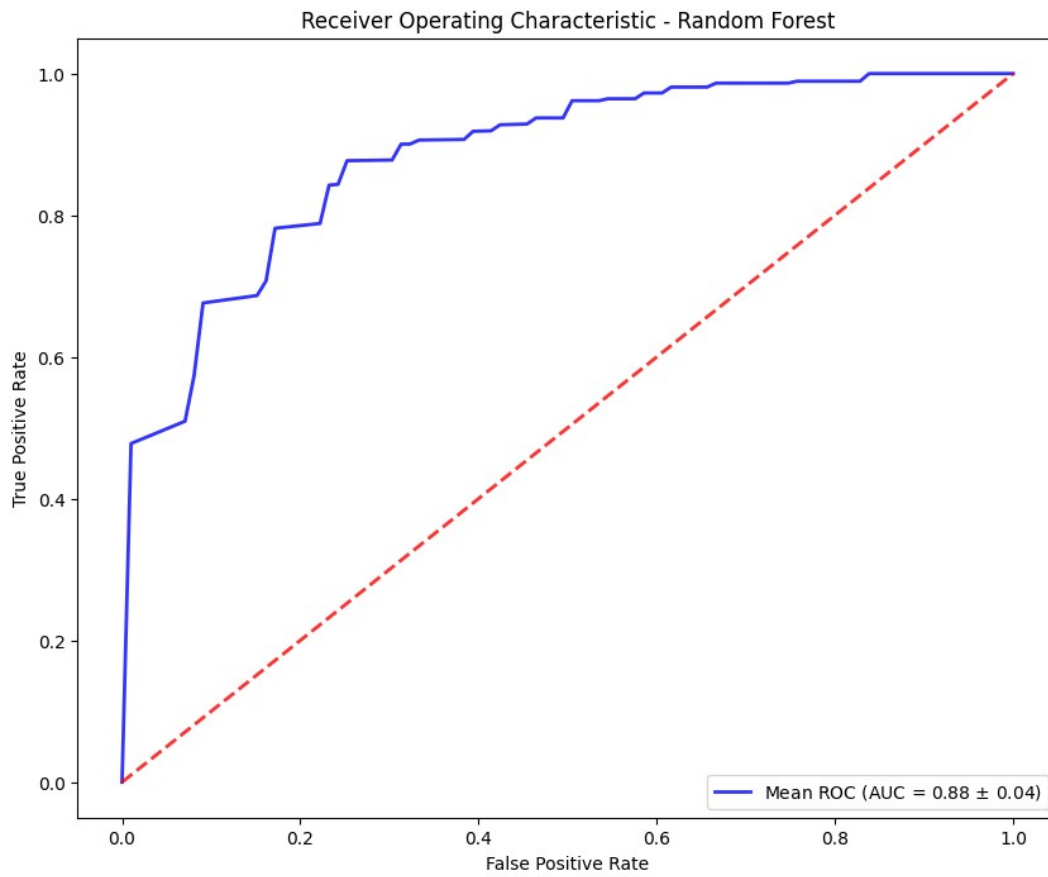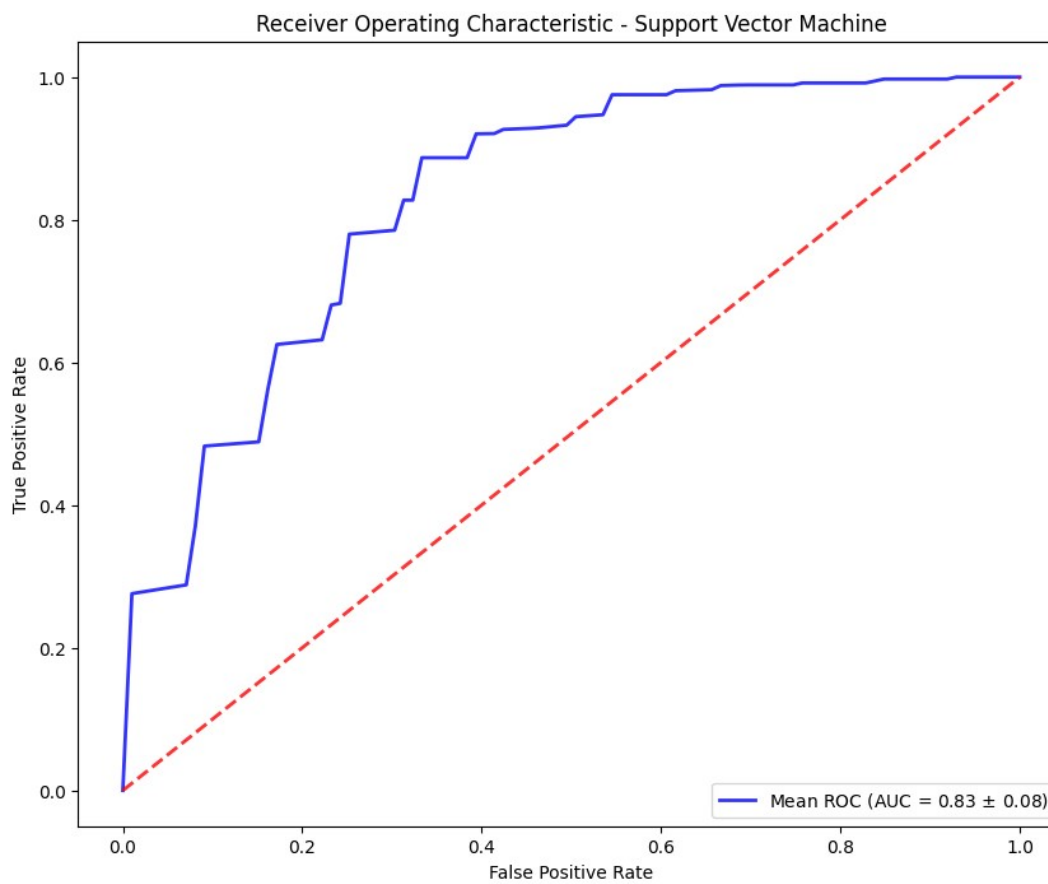

# RMIT Classification: Trusted

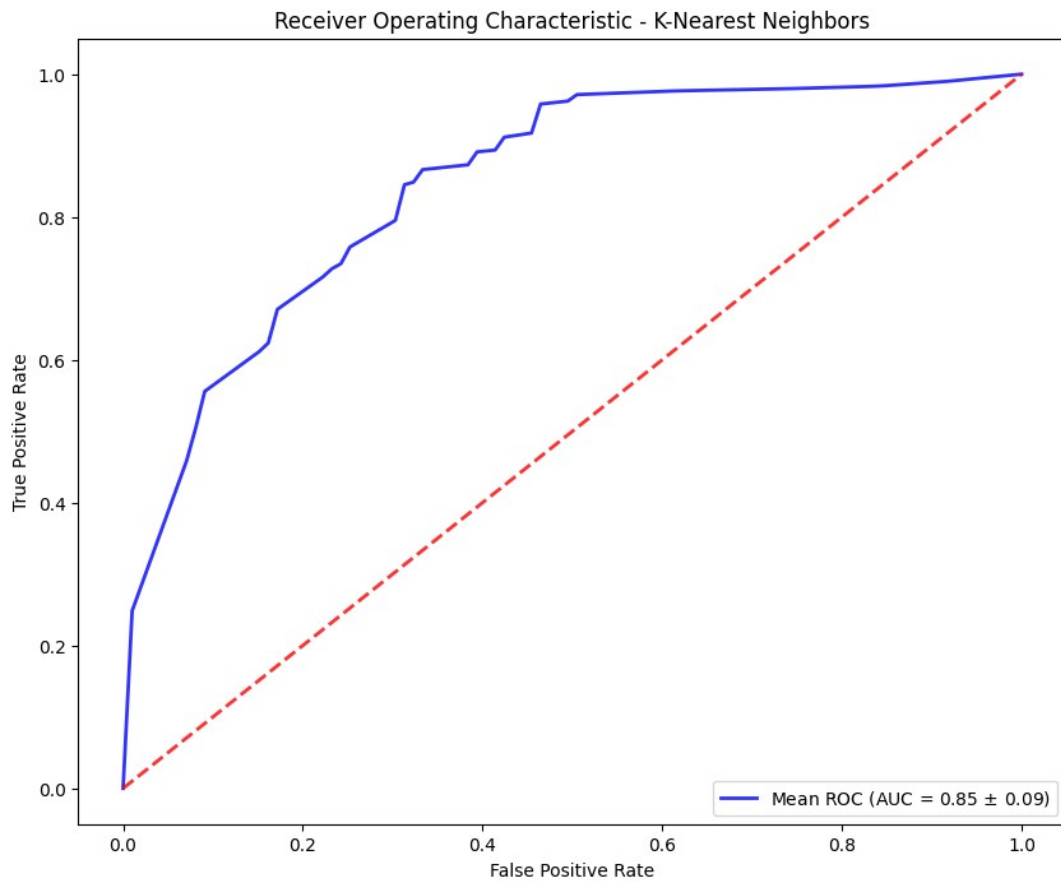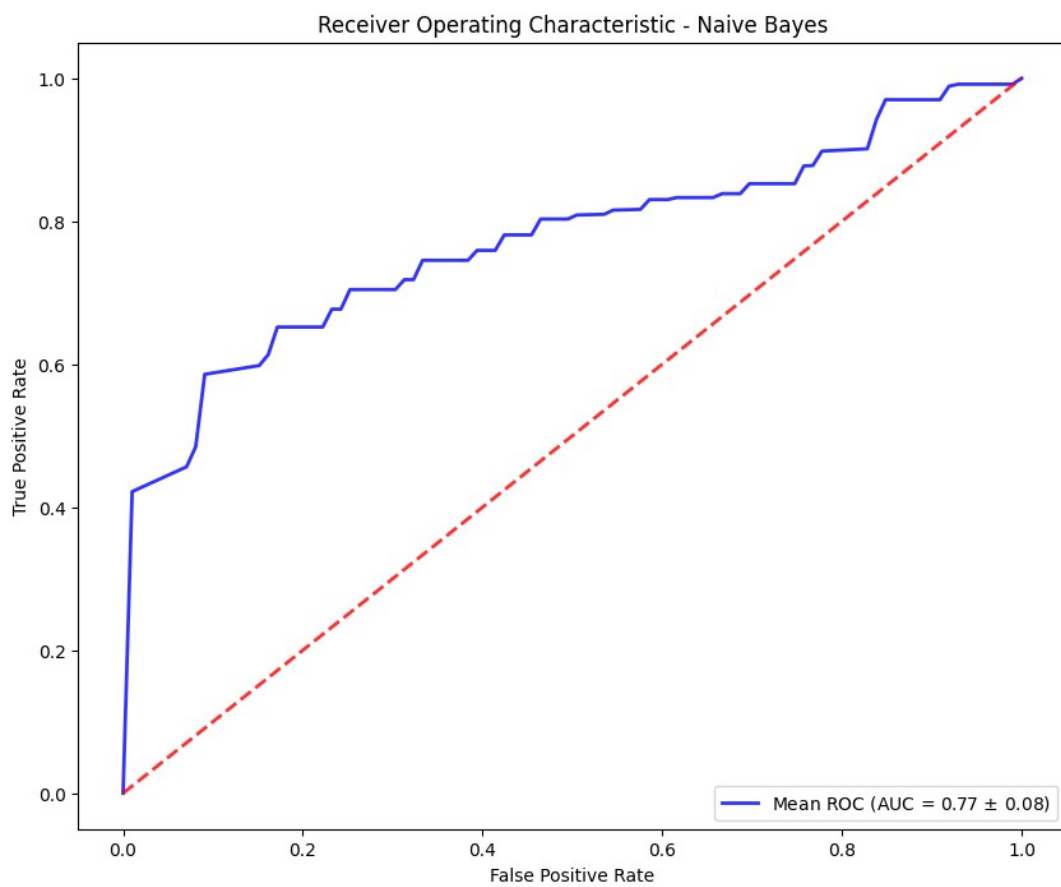

# RMIT Classification: Trusted

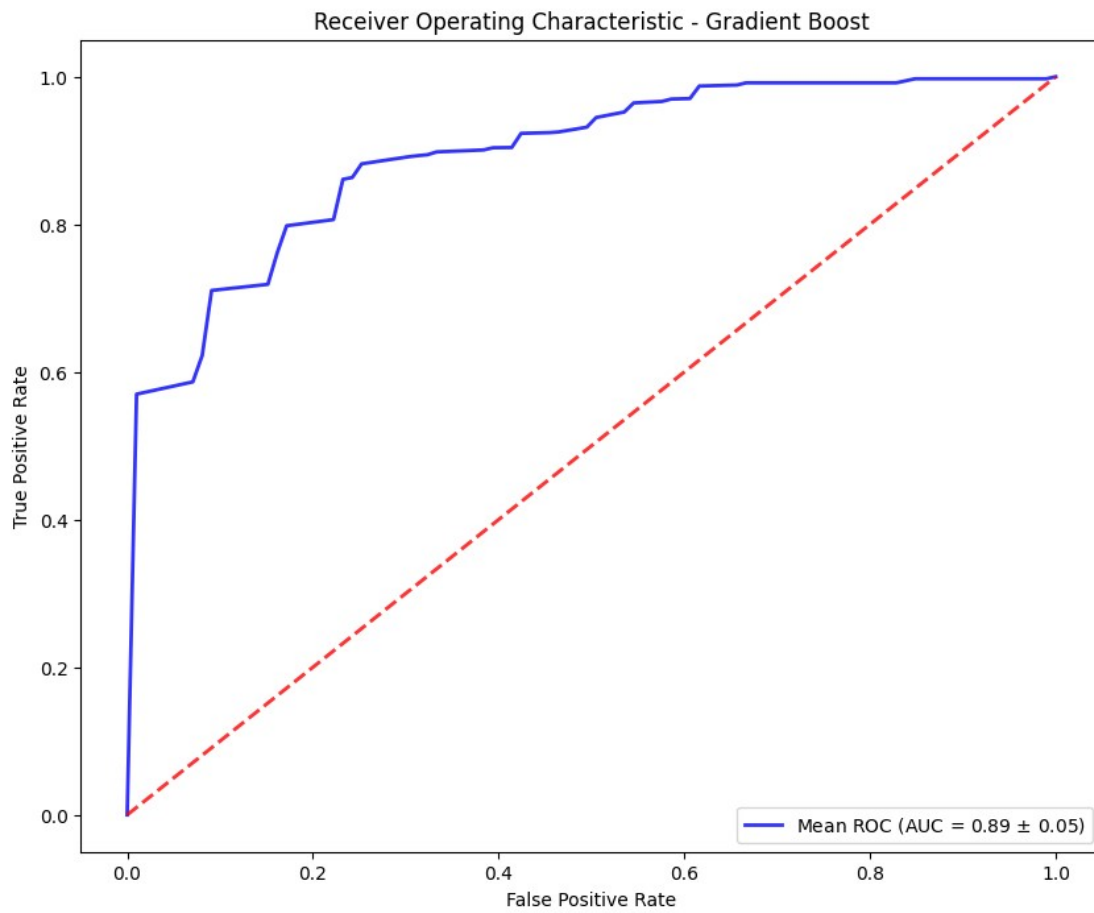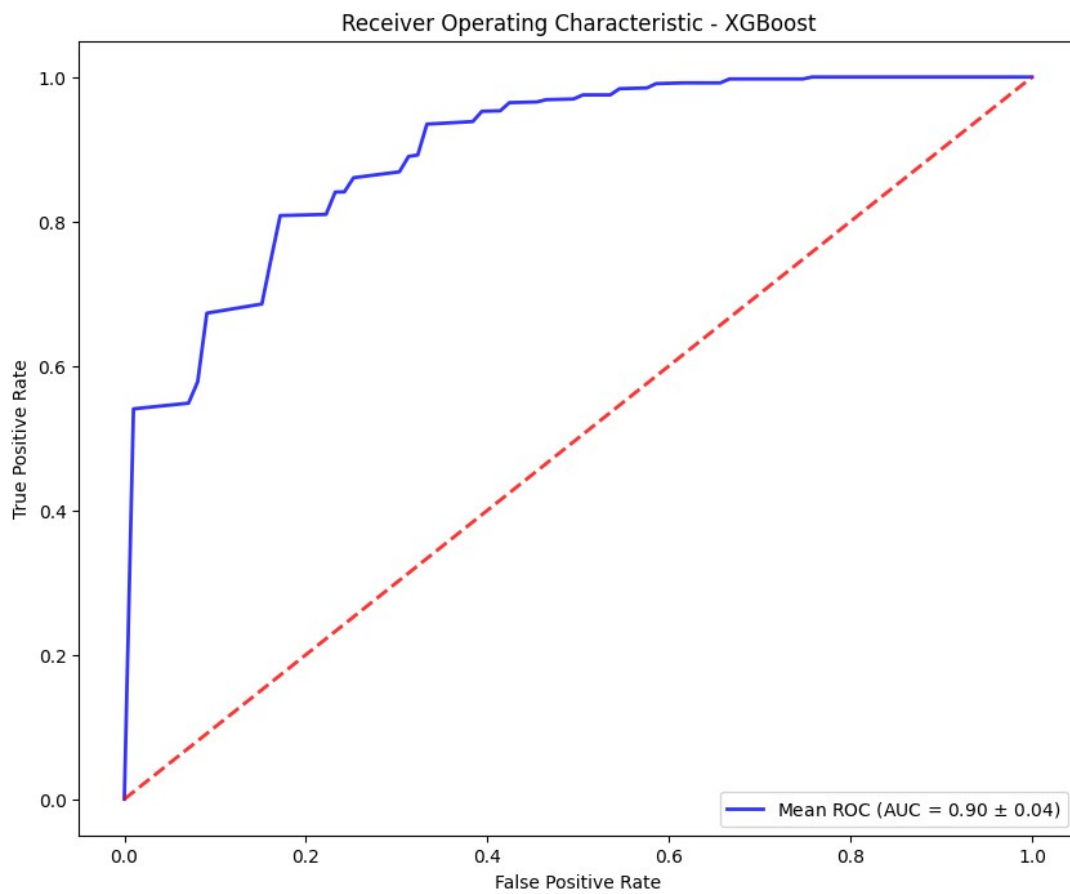

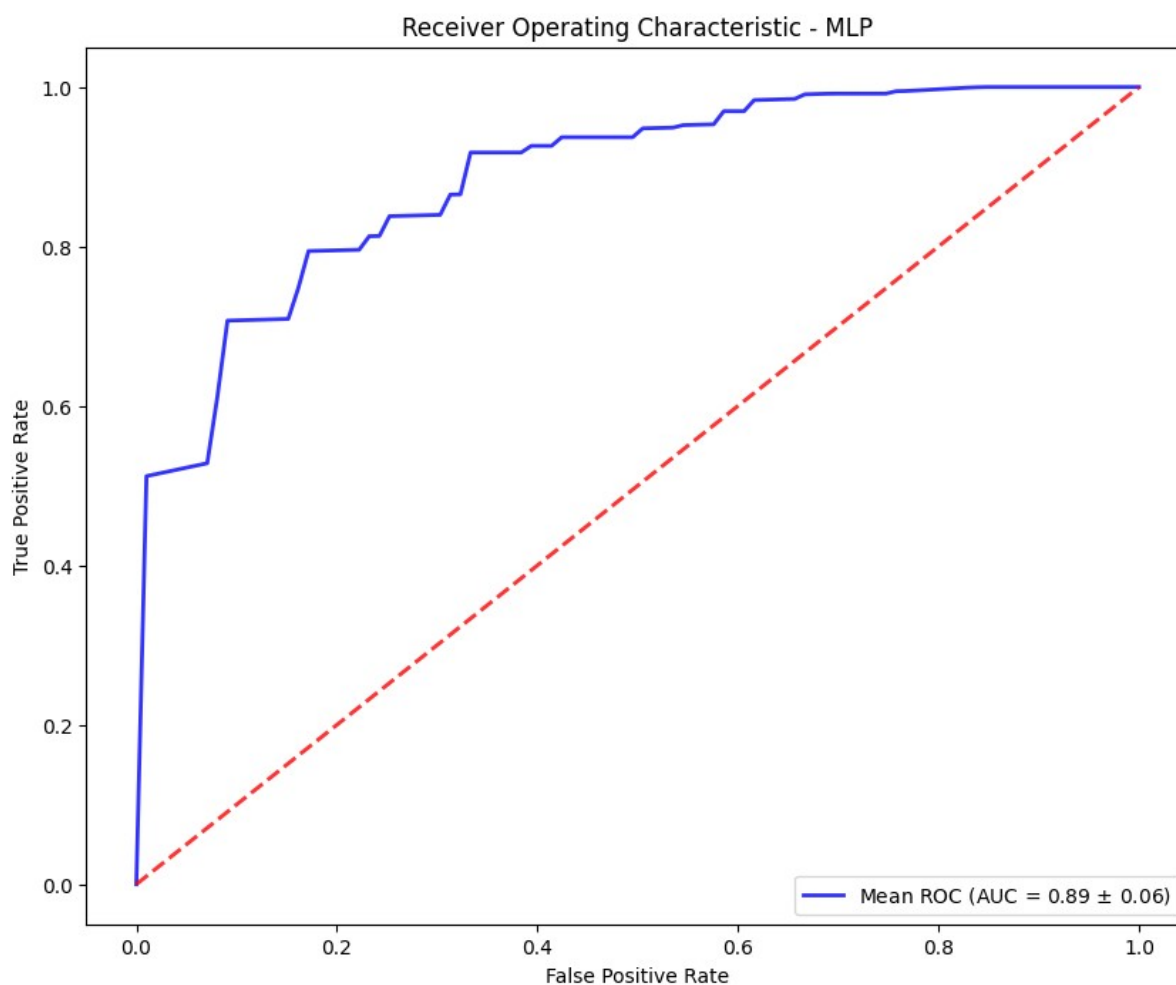

Figure S2. The ROC curves for different ML algorithms

### Section 3: Descriptors importance ranking

Table S1. Descriptor lists and their importance rankings from Random Forest algorithm.

| Descriptor     | Importance |
|----------------|------------|
| Mw (kg/mol)    | 0.083174   |
| P_VSA_MR_6     | 0.064321   |
| P_VSA_LogP_2   | 0.059293   |
| P_VSA_charge_7 | 0.050354   |
| CATS2D_05_LL   | 0.045839   |
| P_VSA_m_2      | 0.042147   |
| SHED_LL        | 0.04047    |
| P_VSA_charge_9 | 0.038355   |
| O%             | 0.037535   |
| P_VSA_ppp_L    | 0.036251   |
| P_VSA_i_2      | 0.035064   |
| ALOGP          | 0.032593   |
| CATS2D_04_LL   | 0.031622   |

|                 |          |
|-----------------|----------|
| AMR             | 0.03125  |
| P_VSA_charge_2  | 0.030445 |
| P_VSA_e_2       | 0.029582 |
| P_VSA_MR_5      | 0.028341 |
| SAscore         | 0.027054 |
| J_B(i)          | 0.026974 |
| Wap             | 0.025576 |
| DELS            | 0.025043 |
| IDET            | 0.022924 |
| P_VSA_s_3       | 0.022489 |
| P_VSA_LogP_4    | 0.022416 |
| P_VSA_charge_14 | 0.022406 |
| P_VSA_LogP_6    | 0.020709 |
| P_VSA_LogP_5    | 0.019448 |
| P_VSA_MR_8      | 0.01604  |
| P_VSA_s_4       | 0.015038 |
| P_VSA_ppp_hal   | 0.008767 |
| nCsp3_endgroup1 | 0.004596 |
| P_VSA_m_4       | 0.003881 |
